# Supplementary material for: Alterations in the placental methylome with maternal obesity and evidence for metabolic regulation
Source: PubMed Central journal article supplement (PMC5646778; doi:10.1371/journal.pone.0186115), 2017-10-18
Supplement: pone.0186115.s010.pdf [file pone.0186115.s010.pdf]

| Annotation Cluster 1 |                                            | Enrichment Score: 3.5186073788569745 |          |             |          |                        |            |          |           |            |           |          |
|----------------------|--------------------------------------------|--------------------------------------|----------|-------------|----------|------------------------|------------|----------|-----------|------------|-----------|----------|
| Category             | Term                                       | Count                                | %        | Fold Enrich | PValue   | Genes                  | List Total | Pop Hits | Pop Total | Bonferroni | Benjamini | FDR      |
| SP_PIR_KEYWORDS      | Secreted                                   | 44                                   | 17.67068 | 2.03695     | 8.74E-06 | MIA, CSH1, PPY, CSH2   | 246        | 1689     | 19235     | 0.00300    | 0.00150   | 0.01192  |
| SP_PIR_KEYWORDS      | disulfide bond                             | 62                                   | 24.89960 | 1.65795     | 4.69E-05 | CSH1, CSH2, CUZD1, A   | 246        | 2924     | 19235     | 0.01600    | 0.00536   | 0.06395  |
| GOTERM_CC_FAT        | GO:0005576~extracellular region            | 47                                   | 18.87550 | 1.77906     | 6.39E-05 | CSH1, CSH2, IL16, LY8I | 168        | 2010     | 12782     | 0.01295    | 0.01295   | 0.08032  |
| UP_SEQ_FEATURE       | disulfide bond                             | 57                                   | 22.89157 | 1.57099     | 4.47E-04 | CSH1, CSH2, CUZD1, A   | 246        | 2819     | 19113     | 0.31534    | 0.17256   | 0.68860  |
| SP_PIR_KEYWORDS      | signal                                     | 62                                   | 24.89960 | 1.49164     | 8.73E-04 | CSH1, CSH2, LY86, CU   | 246        | 3250     | 19235     | 0.25958    | 0.04886   | 1.18472  |
| UP_SEQ_FEATURE       | signal peptide                             | 62                                   | 24.89960 | 1.48218     | 1.03E-03 | CSH1, CSH2, LY86, CU   | 246        | 3250     | 19113     | 0.58130    | 0.15980   | 1.57543  |
| UP_SEQ_FEATURE       | glycosylation site:N-linked (GlcNAc...)    | 74                                   | 29.71888 | 1.39245     | 1.55E-03 | SLC45A2, MCHR1, TRP    | 246        | 4129     | 19113     | 0.73246    | 0.15195   | 2.37622  |
| SP_PIR_KEYWORDS      | glycoprotein                               | 74                                   | 29.71888 | 1.34000     | 4.36E-03 | SLC45A2, MCHR1, TRP    | 246        | 4318     | 19235     | 0.77755    | 0.12772   | 5.78626  |
| Annotation Cluster 2 |                                            | Enrichment Score: 2.6263280765243415 |          |             |          |                        |            |          |           |            |           |          |
| Category             | Term                                       | Count                                | %        | Fold Enrich | PValue   | Genes                  | List Total | Pop Hits | Pop Total | Bonferroni | Benjamini | FDR      |
| INTERPRO             | IPR003598:Immunoglobulin subtype 2         | 12                                   | 4.81928  | 4.33405     | 1.06E-04 | CILP, PSG2, MYBPHL, I  | 225        | 205      | 16659     | 0.05020    | 0.05020   | 0.15242  |
| GOTERM_BP_FAT        | GO:0007565~female pregnancy                | 9                                    | 3.61446  | 5.98290     | 1.26E-04 | CSH1, CSH2, PSG8, PS   | 185        | 110      | 13528     | 0.13751    | 0.13751   | 0.20356  |
| SMART                | SM00408:IGc2                               | 12                                   | 4.81928  | 4.05690     | 1.65E-04 | CILP, PSG2, MYBPHL, I  | 131        | 205      | 9079      | 0.01899    | 0.01899   | 0.18837  |
| SP_PIR_KEYWORDS      | Immunoglobulin domain                      | 17                                   | 6.82731  | 2.82819     | 3.65E-04 | PSG2, CILP, SLAMF8, M  | 246        | 470      | 19235     | 0.11816    | 0.02484   | 0.49741  |
| UP_SEQ_FEATURE       | domain:Ig-like C2-type 1                   | 10                                   | 4.01606  | 4.08922     | 7.94E-04 | PSG8, PSG7, PSG6, PS   | 246        | 190      | 19113     | 0.49024    | 0.20117   | 1.22153  |
| UP_SEQ_FEATURE       | domain:Ig-like C2-type 2                   | 10                                   | 4.01606  | 4.06781     | 8.23E-04 | PSG8, PSG7, PSG6, PS   | 246        | 191      | 19113     | 0.50239    | 0.16011   | 1.26496  |
| UP_SEQ_FEATURE       | domain:Ig-like V-type                      | 8                                    | 3.21285  | 5.01259     | 1.10E-03 | PSG8, PSG7, PSG6, PS   | 246        | 124      | 19113     | 0.60744    | 0.14431   | 1.69111  |
| INTERPRO             | IPR007110:Immunoglobulin-like              | 17                                   | 6.82731  | 2.51234     | 1.24E-03 | PSG2, CILP, SLAMF8, M  | 225        | 501      | 16659     | 0.45229    | 0.25992   | 1.76715  |
| INTERPRO             | IPR003599:Immunoglobulin subtype           | 13                                   | 5.22088  | 2.91673     | 1.76E-03 | PSG2, MYBPHL, PSG1,    | 225        | 330      | 16659     | 0.57319    | 0.24708   | 2.49008  |
| SMART                | SM00409:IG                                 | 13                                   | 5.22088  | 2.73021     | 2.68E-03 | PSG2, MYBPHL, PSG1,    | 131        | 330      | 9079      | 0.26745    | 0.14411   | 3.01462  |
| INTERPRO             | IPR013151:Immunoglobulin                   | 9                                    | 3.61446  | 3.29881     | 6.09E-03 | PSG8, PSG7, PSG6, PS   | 225        | 202      | 16659     | 0.94806    | 0.38918   | 8.38714  |
| INTERPRO             | IPR013106:Immunoglobulin V-set             | 10                                   | 4.01606  | 2.97349     | 6.67E-03 | PSG8, PSG7, PSG6, PS   | 225        | 249      | 16659     | 0.96076    | 0.37034   | 9.14459  |
| INTERPRO             | IPR013783:Immunoglobulin-like fold         | 15                                   | 6.02410  | 2.00832     | 1.76E-02 | PSG2, CILP, MYBPHL, I  | 225        | 553      | 16659     | 0.99982    | 0.65929   | 22.51702 |
| UP_SEQ_FEATURE       | short sequence motif:Cell attachment site  | 5                                    | 2.00803  | 4.41450     | 2.66E-02 | PSG8, PSG7, PSG6, PS   | 246        | 88       | 19113     | 1.00000    | 0.78220   | 34.09875 |
| SP_PIR_KEYWORDS      | tandem repeat                              | 4                                    | 1.60643  | 4.17019     | 7.07E-02 | PSG8, PSG7, PSG6, PS   | 246        | 75       | 19235     | 1.00000    | 0.59389   | 63.23359 |
| UP_SEQ_FEATURE       | domain:Ig-like C2-type 3                   | 4                                    | 1.60643  | 2.54738     | 2.06E-01 | PSG8, PSG7, PSG6, PS   | 246        | 122      | 19113     | 1.00000    | 0.99685   | 97.19209 |
| Annotation Cluster 3 |                                            | Enrichment Score: 2.253436664848397  |          |             |          |                        |            |          |           |            |           |          |
| Category             | Term                                       | Count                                | %        | Fold Enrich | PValue   | Genes                  | List Total | Pop Hits | Pop Total | Bonferroni | Benjamini | FDR      |
| SP_PIR_KEYWORDS      | hormone                                    | 8                                    | 3.21285  | 7.18998     | 1.23E-04 | CSH1, CSHL1, PPY, CS   | 246        | 87       | 19235     | 0.04133    | 0.01050   | 0.16724  |
| INTERPRO             | IPR001400:Somatotropin hormone             | 3                                    | 1.20482  | 37.02000    | 2.61E-03 | CSH1, CSHL1, CSH2      | 225        | 6        | 16659     | 0.71711    | 0.27071   | 3.67070  |
| GOTERM_MF_FAT        | GO:0005179~hormone activity                | 7                                    | 2.81124  | 4.89239     | 3.02E-03 | CSH1, CSHL1, PPY, CS   | 172        | 108      | 12983     | 0.69770    | 0.25850   | 4.12905  |
| PIR_SUPERFAMILY      | PIRSF001825:prolactin/lactogen/growth horm | 3                                    | 1.20482  | 31.60684    | 3.51E-03 | CSH1, CSHL1, CSH2      | 117        | 6        | 7396      | 0.36248    | 0.36248   | 4.00201  |
| INTERPRO             | IPR018116:Somatotropin hormone, conserve   | 3                                    | 1.20482  | 31.73143    | 3.62E-03 | CSH1, CSHL1, CSH2      | 225        | 7        | 16659     | 0.82675    | 0.29574   | 5.05950  |
| SP_PIR_KEYWORDS      | amidation                                  | 3                                    | 1.20482  | 5.33121     | 1.08E-01 | PPY, GNRH2, GAST       | 246        | 44       | 19235     | 1.00000    | 0.70721   | 78.95943 |
| INTERPRO             | IPR012351:Four-helical cytokine, core      | 3                                    | 1.20482  | 4.82870     | 1.27E-01 | CSH1, CSHL1, CSH2      | 225        | 46       | 16659     | 1.00000    | 0.92786   | 85.72490 |
| Annotation Cluster 4 |                                            | Enrichment Score: 1.715342444632135  |          |             |          |                        |            |          |           |            |           |          |
| Category             | Term                                       | Count                                | %        | Fold Enrich | PValue   | Genes                  | List Total | Pop Hits | Pop Total | Bonferroni | Benjamini | FDR      |
| GOTERM_MF_FAT        | GO:0005529~sugar binding                   | 11                                   | 4.41767  | 4.25799     | 2.58E-04 | ASGR2, LGALS7B, GCF    | 172        | 195      | 12983     | 0.09673    | 0.09673   | 0.35793  |
| SP_PIR_KEYWORDS      | Lectin                                     | 9                                    | 3.61446  | 4.42591     | 1.00E-03 | ASGR2, LGALS7B, FCN    | 246        | 159      | 19235     | 0.29220    | 0.04817   | 1.36113  |
| GOTERM_MF_FAT        | GO:0030246~carbohydrate binding            | 13                                   | 5.22088  | 2.77196     | 2.54E-03 | LGALS9C, ITLN2, LGAL   | 172        | 354      | 12983     | 0.63419    | 0.28481   | 3.48246  |
| INTERPRO             | IPR008160:Collagen triple helix repeat     | 5                                    | 2.00803  | 4.40714     | 2.66E-02 | FCN2, SFTPA2, COL12/   | 225        | 84       | 16659     | 1.00000    | 0.72925   | 32.08816 |
| SP_PIR_KEYWORDS      | collagen                                   | 5                                    | 2.00803  | 4.11532     | 3.33E-02 | FCN2, SFTPA2, COL12/   | 246        | 95       | 19235     | 0.99999    | 0.42533   | 36.95493 |
| UP_SEQ_FEATURE       | domain:C-type lectin                       | 4                                    | 1.60643  | 3.93393     | 8.11E-02 | ASGR2, SFTPA2, COLE    | 246        | 79       | 19113     | 1.00000    | 0.92972   | 72.95527 |
| INTERPRO             | IPR001304:C-type lectin                    | 4                                    | 1.60643  | 3.61171     | 9.84E-02 | ASGR2, SFTPA2, COLE    | 225        | 82       | 16659     | 1.00000    | 0.88698   | 77.35280 |
| INTERPRO             | IPR018378:C-type lectin, conserved site    | 4                                    | 1.60643  | 3.61171     | 9.84E-02 | ASGR2, SFTPA2, COLE    | 225        | 82       | 16659     | 1.00000    | 0.88698   | 77.35280 |
| SMART                | SM00034:CLECT                              | 4                                    | 1.60643  | 3.38075     | 1.13E-01 | ASGR2, SFTPA2, COLE    | 131        | 82       | 9079      | 1.00000    | 0.86255   | 74.49397 |
| INTERPRO             | IPR016186:C-type lectin-like               | 4                                    | 1.60643  | 3.11747     | 1.36E-01 | ASGR2, SFTPA2, COLE    | 225        | 95       | 16659     | 1.00000    | 0.92740   | 87.72133 |
| Annotation Cluster 5 |                                            | Enrichment Score: 1.7127623933184326 |          |             |          |                        |            |          |           |            |           |          |
| Category             | Term                                       | Count                                | %        | Fold Enrich | PValue   | Genes                  | List Total | Pop Hits | Pop Total | Bonferroni | Benjamini | FDR      |
| GOTERM_CC_FAT        | GO:0016529~sarcoplasmic reticulum          | 4                                    | 1.60643  | 7.80342     | 1.42E-02 | ANK1, PYGM, SRL, AR1   | 168        | 39       | 12782     | 0.94579    | 0.62154   | 16.44613 |
| GOTERM_CC_FAT        | GO:0016528~sarcoplasm                      | 4                                    | 1.60643  | 7.42276     | 1.62E-02 | ANK1, PYGM, SRL, AR1   | 168        | 41       | 12782     | 0.96456    | 0.56611   | 18.60616 |

|                       |                                         |                                      |          |             |          |                       |            |          |           |            |           |          |
|-----------------------|-----------------------------------------|--------------------------------------|----------|-------------|----------|-----------------------|------------|----------|-----------|------------|-----------|----------|
| SP_PIR_KEYWORDS       | sarcoplasmic reticulum                  | 3                                    | 1.20482  | 10.66242    | 3.16E-02 | ANK1, SRL, ART1       | 246        | 22       | 19235     | 0.99998    | 0.44054   | 35.44134 |
| Annotation Cluster 6  |                                         | Enrichment Score: 1.5960334291609053 |          |             |          |                       |            |          |           |            |           |          |
| Category              | Term                                    | Count                                | %        | Fold Enrich | PValue   | Genes                 | List Total | Pop Hits | Pop Total | Bonferroni | Benjamini | FDR      |
| SP_PIR_KEYWORDS       | sh3 domain                              | 8                                    | 3.21285  | 2.97871     | 1.83E-02 | MIA, FGR, GRAPL, ARF  | 246        | 210      | 19235     | 0.99827    | 0.36516   | 22.29585 |
| INTERPRO              | IPR001452:Src homology-3 domain         | 8                                    | 3.21285  | 2.78085     | 2.54E-02 | MIA, FGR, GRAPL, ARF  | 225        | 213      | 16659     | 1.00000    | 0.74890   | 30.81255 |
| UP_SEQ_FEATURE        | domain:SH3                              | 7                                    | 2.81124  | 3.07269     | 2.68E-02 | MIA, FGR, GRAPL, ARF  | 246        | 177      | 19113     | 1.00000    | 0.76296   | 34.30240 |
| SMART                 | SM00326:SH3                             | 8                                    | 3.21285  | 2.60302     | 3.32E-02 | MIA, FGR, GRAPL, ARF  | 131        | 213      | 9079      | 0.97998    | 0.72846   | 31.93122 |
| Annotation Cluster 7  |                                         | Enrichment Score: 1.5958504189132505 |          |             |          |                       |            |          |           |            |           |          |
| Category              | Term                                    | Count                                | %        | Fold Enrich | PValue   | Genes                 | List Total | Pop Hits | Pop Total | Bonferroni | Benjamini | FDR      |
| UP_SEQ_FEATURE        | domain:EF-hand 3                        | 7                                    | 2.81124  | 5.78581     | 1.33E-03 | CIB4, MYL4, CALML4, C | 246        | 94       | 19113     | 0.67568    | 0.14859   | 2.03291  |
| PIR_SUPERFAMILY       | PIRSF002350:calmodulin                  | 4                                    | 1.60643  | 10.53561    | 5.98E-03 | MYL4, CALML4, CALML   | 117        | 24       | 7396      | 0.53620    | 0.31897   | 6.73338  |
| UP_SEQ_FEATURE        | domain:EF-hand 4                        | 5                                    | 2.00803  | 6.58433     | 6.91E-03 | CALML4, CALML3, CET   | 246        | 59       | 19113     | 0.99720    | 0.41396   | 10.16679 |
| UP_SEQ_FEATURE        | domain:EF-hand 1                        | 8                                    | 3.21285  | 3.41517     | 9.19E-03 | CIB4, MYL4, CALML4, C | 246        | 182      | 19113     | 0.99960    | 0.47918   | 13.30598 |
| UP_SEQ_FEATURE        | calcium-binding region:2                | 6                                    | 2.40964  | 4.05366     | 1.63E-02 | CIB4, CALML3, CETN2,  | 246        | 115      | 19113     | 1.00000    | 0.65819   | 22.47345 |
| UP_SEQ_FEATURE        | calcium-binding region:1                | 6                                    | 2.40964  | 3.69977     | 2.32E-02 | CIB4, CALML3, CETN2,  | 246        | 126      | 19113     | 1.00000    | 0.75914   | 30.47721 |
| UP_SEQ_FEATURE        | domain:EF-hand 2                        | 7                                    | 2.81124  | 2.98827     | 3.01E-02 | CIB4, MYL4, CALML4, C | 246        | 182      | 19113     | 1.00000    | 0.76333   | 37.69596 |
| SP_PIR_KEYWORDS       | EF hand                                 | 4                                    | 1.60643  | 5.21274     | 4.11E-02 | CALML3, CETN2, CAPN   | 246        | 60       | 19235     | 1.00000    | 0.45185   | 43.57146 |
| INTERPRO              | IPR011992:EF-Hand type                  | 8                                    | 3.21285  | 2.50983     | 4.11E-02 | CIB4, MYL4, CALML4, C | 225        | 236      | 16659     | 1.00000    | 0.79022   | 45.18925 |
| SP_PIR_KEYWORDS       | calcium binding                         | 5                                    | 2.00803  | 3.79568     | 4.27E-02 | CALML3, CETN2, C1S,   | 246        | 103      | 19235     | 1.00000    | 0.45178   | 44.89398 |
| INTERPRO              | IPR002048:Calcium-binding EF-hand       | 6                                    | 2.40964  | 3.10657     | 4.40E-02 | CIB4, CALML4, CALML3  | 225        | 143      | 16659     | 1.00000    | 0.78932   | 47.57330 |
| SMART                 | SM00054:EFh                             | 6                                    | 2.40964  | 2.90792     | 5.43E-02 | CIB4, CALML4, CALML3  | 131        | 143      | 9079      | 0.99845    | 0.80168   | 47.08492 |
| INTERPRO              | IPR018249:EF-HAND 2                     | 7                                    | 2.81124  | 2.41060     | 7.07E-02 | CIB4, MYL4, CALML4, C | 225        | 215      | 16659     | 1.00000    | 0.87616   | 65.06496 |
| INTERPRO              | IPR018248:EF hand                       | 5                                    | 2.00803  | 2.84769     | 9.84E-02 | CIB4, CALML3, CETN2,  | 225        | 130      | 16659     | 1.00000    | 0.89764   | 77.35139 |
| INTERPRO              | IPR018247:EF-HAND 1                     | 6                                    | 2.40964  | 2.04719     | 1.67E-01 | CIB4, CALML3, CETN2,  | 225        | 217      | 16659     | 1.00000    | 0.95754   | 92.71785 |
| Annotation Cluster 8  |                                         | Enrichment Score: 1.5464909536406366 |          |             |          |                       |            |          |           |            |           |          |
| Category              | Term                                    | Count                                | %        | Fold Enrich | PValue   | Genes                 | List Total | Pop Hits | Pop Total | Bonferroni | Benjamini | FDR      |
| GOTERM_CC_FAT         | GO:0005887~integral to plasma membrane  | 25                                   | 10.04016 | 1.60108     | 2.07E-02 | KCNMB3, MCHR1, CLD    | 168        | 1188     | 12782     | 0.98609    | 0.57476   | 23.16745 |
| GOTERM_CC_FAT         | GO:0031226~intrinsic to plasma membrane | 25                                   | 10.04016 | 1.56550     | 2.63E-02 | KCNMB3, MCHR1, CLD    | 168        | 1215     | 12782     | 0.99567    | 0.59626   | 28.49747 |
| GOTERM_CC_FAT         | GO:0005886~plasma membrane              | 62                                   | 24.89960 | 1.24892     | 3.02E-02 | MCHR1, CLDN4, MYO7    | 168        | 3777     | 12782     | 0.99807    | 0.54223   | 31.97678 |
| GOTERM_CC_FAT         | GO:0044459~plasma membrane part         | 39                                   | 15.66265 | 1.34691     | 3.96E-02 | KCNMB3, MCHR1, CLD    | 168        | 2203     | 12782     | 0.99973    | 0.52690   | 39.79922 |
| Annotation Cluster 9  |                                         | Enrichment Score: 1.5333981715143548 |          |             |          |                       |            |          |           |            |           |          |
| Category              | Term                                    | Count                                | %        | Fold Enrich | PValue   | Genes                 | List Total | Pop Hits | Pop Total | Bonferroni | Benjamini | FDR      |
| GOTERM_BP_FAT         | GO:0007588~excretion                    | 6                                    | 2.40964  | 7.56459     | 1.13E-03 | TRPV1, CLCNKA, CLCN   | 185        | 58       | 13528     | 0.73275    | 0.48304   | 1.80117  |
| GOTERM_BP_FAT         | GO:0046903~secretion                    | 10                                   | 4.01606  | 2.43748     | 2.16E-02 | PPY, ANK1, TRPV1, LA  | 185        | 300      | 13528     | 1.00000    | 0.97421   | 29.71863 |
| SP_PIR_KEYWORDS       | ion transport                           | 12                                   | 4.81928  | 1.62334     | 1.22E-01 | KCNMB3, TTYH3, TRPV   | 246        | 578      | 19235     | 1.00000    | 0.70135   | 83.02044 |
| GOTERM_BP_FAT         | GO:0055085~transmembrane transport      | 11                                   | 4.41767  | 1.41365     | 2.47E-01 | SLC2A9, FOLR2, TRPV   | 185        | 569      | 13528     | 1.00000    | 0.99529   | 98.97092 |
| Annotation Cluster 10 |                                         | Enrichment Score: 1.4544487344066226 |          |             |          |                       |            |          |           |            |           |          |
| Category              | Term                                    | Count                                | %        | Fold Enrich | PValue   | Genes                 | List Total | Pop Hits | Pop Total | Bonferroni | Benjamini | FDR      |
| GOTERM_BP_FAT         | GO:0007155~cell adhesion                | 19                                   | 7.63052  | 1.98480     | 7.05E-03 | MIA, CLDN18, THRA, CI | 185        | 700      | 13528     | 0.99975    | 0.87391   | 10.78228 |
| GOTERM_BP_FAT         | GO:0022610~biological adhesion          | 19                                   | 7.63052  | 1.98197     | 7.16E-03 | MIA, CLDN18, THRA, CI | 185        | 701      | 13528     | 0.99978    | 0.81369   | 10.92803 |
| SP_PIR_KEYWORDS       | cell adhesion                           | 9                                    | 3.61446  | 1.66758     | 1.73E-01 | APP, SIGLEC8, ITGAE,  | 246        | 422      | 19235     | 1.00000    | 0.81218   | 92.47044 |
| GOTERM_BP_FAT         | GO:0016337~cell-cell adhesion           | 7                                    | 2.81124  | 1.85460     | 1.75E-01 | LGALS7B, CLDN18, THI  | 185        | 276      | 13528     | 1.00000    | 0.99683   | 95.45285 |
| Annotation Cluster 11 |                                         | Enrichment Score: 1.3475161599045595 |          |             |          |                       |            |          |           |            |           |          |
| Category              | Term                                    | Count                                | %        | Fold Enrich | PValue   | Genes                 | List Total | Pop Hits | Pop Total | Bonferroni | Benjamini | FDR      |
| UP_SEQ_FEATURE        | topological domain:Extracellular        | 52                                   | 20.88353 | 1.48589     | 2.97E-03 | MCHR1, SLC45A2, CLD   | 246        | 2719     | 19113     | 0.91978    | 0.24447   | 4.49769  |
| UP_SEQ_FEATURE        | topological domain:Cytoplasmic          | 60                                   | 24.09639 | 1.38166     | 6.44E-03 | MCHR1, SLC45A2, CLD   | 246        | 3374     | 19113     | 0.99582    | 0.42171   | 9.50679  |
| GOTERM_CC_FAT         | GO:0005886~plasma membrane              | 62                                   | 24.89960 | 1.24892     | 3.02E-02 | MCHR1, CLDN4, MYO7    | 168        | 3777     | 12782     | 0.99807    | 0.54223   | 31.97678 |
| UP_SEQ_FEATURE        | transmembrane region                    | 75                                   | 30.12048 | 1.18655     | 6.21E-02 | SLC45A2, MCHR1, CLD   | 246        | 4911     | 19113     | 1.00000    | 0.91544   | 62.89011 |
| SP_PIR_KEYWORDS       | transmembrane                           | 75                                   | 30.12048 | 1.17923     | 6.96E-02 | SLC45A2, MCHR1, CLD   | 246        | 4973     | 19235     | 1.00000    | 0.60093   | 62.60305 |
| GOTERM_CC_FAT         | GO:0016021~integral to membrane         | 78                                   | 31.32530 | 1.12035     | 1.25E-01 | SLC45A2, MCHR1, CLD   | 168        | 5297     | 12782     | 1.00000    | 0.74284   | 81.25432 |
| GOTERM_CC_FAT         | GO:0031224~intrinsic to membrane        | 79                                   | 31.72691 | 1.09582     | 1.79E-01 | SLC45A2, MCHR1, CLD   | 168        | 5485     | 12782     | 1.00000    | 0.77470   | 91.62848 |

|                                                            |                                            |       |          |             |          |                        |            |          |           |            |           |          |
|------------------------------------------------------------|--------------------------------------------|-------|----------|-------------|----------|------------------------|------------|----------|-----------|------------|-----------|----------|
| SP_PIR_KEYWORDS                                            | membrane                                   | 85    | 34.13655 | 1.06238     | 2.98E-01 | SLC45A2, MCHR1, CLD    | 246        | 6256     | 19235     | 1.00000    | 0.87324   | 99.20332 |
| Annotation Cluster 12 Enrichment Score: 1.3474421130431482 |                                            |       |          |             |          |                        |            |          |           |            |           |          |
| Category                                                   | Term                                       | Count | %        | Fold Enrich | PValue   | Genes                  | List Total | Pop Hits | Pop Total | Bonferroni | Benjamini | FDR      |
| GOTERM_CC_FAT                                              | GO:0005929~cilium                          | 6     | 2.40964  | 3.53876     | 2.70E-02 | GNAT1, MCHR1, APP, C   | 168        | 129      | 12782     | 0.99627    | 0.55010   | 29.15228 |
| GOTERM_CC_FAT                                              | GO:0044463~cell projection part            | 8     | 3.21285  | 2.60114     | 3.40E-02 | GNAT1, APP, DNALI1, T  | 168        | 234      | 12782     | 0.99915    | 0.54393   | 35.30901 |
| GOTERM_CC_FAT                                              | GO:0042995~cell projection                 | 16    | 6.42570  | 1.74653     | 3.94E-02 | FGD2, GNAT1, MCHR1,    | 168        | 697      | 12782     | 0.99972    | 0.55912   | 39.63906 |
| GOTERM_CC_FAT                                              | GO:0044441~cilium part                     | 3     | 1.20482  | 5.18750     | 1.13E-01 | GNAT1, APP, CROCC      | 168        | 44       | 12782     | 1.00000    | 0.74156   | 77.71535 |
| Annotation Cluster 13 Enrichment Score: 1.1965039354208902 |                                            |       |          |             |          |                        |            |          |           |            |           |          |
| Category                                                   | Term                                       | Count | %        | Fold Enrich | PValue   | Genes                  | List Total | Pop Hits | Pop Total | Bonferroni | Benjamini | FDR      |
| SP_PIR_KEYWORDS                                            | hydroxyproline                             | 4     | 1.60643  | 8.45309     | 1.15E-02 | FCN2, SFTPA2, COL12/   | 246        | 37       | 19235     | 0.98148    | 0.28280   | 14.63053 |
| SP_PIR_KEYWORDS                                            | hydroxylation                              | 5     | 2.00803  | 5.50641     | 1.28E-02 | FCN2, SFTPA2, COL12/   | 246        | 71       | 19235     | 0.98820    | 0.28928   | 16.14188 |
| INTERPRO                                                   | IPR008160:Collagen triple helix repeat     | 5     | 2.00803  | 4.40714     | 2.66E-02 | FCN2, SFTPA2, COL12/   | 225        | 84       | 16659     | 1.00000    | 0.72925   | 32.08816 |
| SP_PIR_KEYWORDS                                            | collagen                                   | 5     | 2.00803  | 4.11532     | 3.33E-02 | FCN2, SFTPA2, COL12/   | 246        | 95       | 19235     | 0.99999    | 0.42533   | 36.95493 |
| UP_SEQ_FEATURE                                             | domain:Collagen-like                       | 3     | 1.20482  | 6.47459     | 7.76E-02 | FCN2, SFTPA2, SFTPA    | 246        | 36       | 19113     | 1.00000    | 0.94235   | 71.32277 |
| GOTERM_CC_FAT                                              | GO:0005578~proteinaceous extracellular mat | 7     | 2.81124  | 1.66432     | 2.41E-01 | MMP21, NAV2, SFTPA2    | 168        | 320      | 12782     | 1.00000    | 0.79974   | 96.88639 |
| GOTERM_CC_FAT                                              | GO:0031012~extracellular matrix            | 7     | 2.81124  | 1.54372     | 2.97E-01 | MMP21, NAV2, SFTPA2    | 168        | 345      | 12782     | 1.00000    | 0.84122   | 98.80123 |
| SP_PIR_KEYWORDS                                            | extracellular matrix                       | 5     | 2.00803  | 1.62222     | 3.69E-01 | SFTPA2, CILP, COL12A   | 246        | 241      | 19235     | 1.00000    | 0.91247   | 99.81236 |
| Annotation Cluster 14 Enrichment Score: 1.128278685377582  |                                            |       |          |             |          |                        |            |          |           |            |           |          |
| Category                                                   | Term                                       | Count | %        | Fold Enrich | PValue   | Genes                  | List Total | Pop Hits | Pop Total | Bonferroni | Benjamini | FDR      |
| GOTERM_BP_FAT                                              | GO:0006952~defense response                | 18    | 7.22892  | 2.14022     | 4.35E-03 | SPACA3, SP100, FGR,    | 185        | 615      | 13528     | 0.99391    | 0.81738   | 6.78515  |
| GOTERM_BP_FAT                                              | GO:0002526~acute inflammatory response     | 5     | 2.00803  | 3.73083     | 4.46E-02 | ORM1, TRPV1, FCN2, S   | 185        | 98       | 13528     | 1.00000    | 0.99522   | 52.09416 |
| SP_PIR_KEYWORDS                                            | acute phase                                | 3     | 1.20482  | 8.08873     | 5.24E-02 | ORM1, SERPINA1, C1S    | 246        | 29       | 19235     | 1.00000    | 0.50919   | 51.99156 |
| GOTERM_BP_FAT                                              | GO:0006953~acute-phase response            | 3     | 1.20482  | 5.48432     | 1.03E-01 | ORM1, TRPV1, SERPIN    | 185        | 40       | 13528     | 1.00000    | 0.99685   | 82.53733 |
| GOTERM_BP_FAT                                              | GO:0006954~inflammatory response           | 7     | 2.81124  | 1.57499     | 2.78E-01 | ORM1, TRPV1, FCN2, L   | 185        | 325      | 13528     | 1.00000    | 0.99632   | 99.47573 |
| GOTERM_BP_FAT                                              | GO:0009611~response to wounding            | 8     | 3.21285  | 1.10376     | 5.86E-01 | ORM1, TRPV1, FCN2, L   | 185        | 530      | 13528     | 1.00000    | 0.99905   | 99.99993 |
| Annotation Cluster 15 Enrichment Score: 1.1233807915335263 |                                            |       |          |             |          |                        |            |          |           |            |           |          |
| Category                                                   | Term                                       | Count | %        | Fold Enrich | PValue   | Genes                  | List Total | Pop Hits | Pop Total | Bonferroni | Benjamini | FDR      |
| UP_SEQ_FEATURE                                             | domain:MAGE                                | 3     | 1.20482  | 7.28392     | 6.31E-02 | MAGEB1, MAGED4, MA     | 246        | 32       | 19113     | 1.00000    | 0.90964   | 63.52409 |
| INTERPRO                                                   | IPR002190:MAGE protein                     | 3     | 1.20482  | 6.34629     | 8.02E-02 | MAGEB1, MAGED4, MA     | 225        | 35       | 16659     | 1.00000    | 0.88110   | 69.82859 |
| SP_PIR_KEYWORDS                                            | tumor antigen                              | 3     | 1.20482  | 6.17298     | 8.42E-02 | MAGEB1, MAGED4, MA     | 246        | 38       | 19235     | 1.00000    | 0.63545   | 69.89587 |
| Annotation Cluster 16 Enrichment Score: 1.0994139339883393 |                                            |       |          |             |          |                        |            |          |           |            |           |          |
| Category                                                   | Term                                       | Count | %        | Fold Enrich | PValue   | Genes                  | List Total | Pop Hits | Pop Total | Bonferroni | Benjamini | FDR      |
| UP_SEQ_FEATURE                                             | repeat:ANK 5                               | 6     | 2.40964  | 3.55856     | 2.69E-02 | ANK1, POTEH, TRPV1,    | 246        | 131      | 19113     | 1.00000    | 0.74349   | 34.41942 |
| UP_SEQ_FEATURE                                             | repeat:ANK 3                               | 7     | 2.81124  | 2.80343     | 3.93E-02 | ANK1, POTEH, TRPV1,    | 246        | 194      | 19113     | 1.00000    | 0.81707   | 46.18734 |
| UP_SEQ_FEATURE                                             | repeat:ANK 4                               | 6     | 2.40964  | 2.95045     | 5.31E-02 | ANK1, POTEH, TRPV1,    | 246        | 158      | 19113     | 1.00000    | 0.88940   | 56.97540 |
| UP_SEQ_FEATURE                                             | repeat:ANK 1                               | 7     | 2.81124  | 2.35440     | 7.76E-02 | ANK1, POTEH, TRPV1,    | 246        | 231      | 19113     | 1.00000    | 0.93540   | 71.32783 |
| UP_SEQ_FEATURE                                             | repeat:ANK 2                               | 7     | 2.81124  | 2.34425     | 7.88E-02 | ANK1, POTEH, TRPV1,    | 246        | 232      | 19113     | 1.00000    | 0.93135   | 71.92679 |
| SP_PIR_KEYWORDS                                            | ank repeat                                 | 7     | 2.81124  | 2.28057     | 8.72E-02 | ANK1, POTEH, TRPV1,    | 246        | 240      | 19235     | 1.00000    | 0.63662   | 71.19064 |
| INTERPRO                                                   | IPR002110:Ankyrin                          | 7     | 2.81124  | 2.17765     | 1.02E-01 | ANK1, POTEH, TRPV1,    | 225        | 238      | 16659     | 1.00000    | 0.88605   | 78.64508 |
| SMART                                                      | SM00248:ANK                                | 7     | 2.81124  | 2.03839     | 1.26E-01 | ANK1, POTEH, TRPV1,    | 131        | 238      | 9079      | 1.00000    | 0.85876   | 78.56281 |
| UP_SEQ_FEATURE                                             | repeat:ANK 6                               | 3     | 1.20482  | 2.53354     | 3.30E-01 | ANK1, POTEH, TRPV1     | 246        | 92       | 19113     | 1.00000    | 0.99956   | 99.79799 |
| Annotation Cluster 17 Enrichment Score: 1.0887988776191155 |                                            |       |          |             |          |                        |            |          |           |            |           |          |
| Category                                                   | Term                                       | Count | %        | Fold Enrich | PValue   | Genes                  | List Total | Pop Hits | Pop Total | Bonferroni | Benjamini | FDR      |
| INTERPRO                                                   | IPR001715:Calponin-like actin-binding      | 4     | 1.60643  | 4.23086     | 6.82E-02 | SYNE2, ARHGEF7, NAV    | 225        | 70       | 16659     | 1.00000    | 0.88190   | 63.66170 |
| SMART                                                      | SM00033:CH                                 | 4     | 1.60643  | 3.96031     | 7.87E-02 | SYNE2, ARHGEF7, NAV    | 131        | 70       | 9079      | 0.99993    | 0.85059   | 60.73573 |
| UP_SEQ_FEATURE                                             | domain:CH                                  | 3     | 1.20482  | 5.54965     | 1.01E-01 | ARHGEF7, NAV2, SMT     | 246        | 42       | 19113     | 1.00000    | 0.96016   | 80.71698 |
| Annotation Cluster 18 Enrichment Score: 0.9847830836704512 |                                            |       |          |             |          |                        |            |          |           |            |           |          |
| Category                                                   | Term                                       | Count | %        | Fold Enrich | PValue   | Genes                  | List Total | Pop Hits | Pop Total | Bonferroni | Benjamini | FDR      |
| GOTERM_MF_FAT                                              | GO:0003774~motor activity                  | 6     | 2.40964  | 3.18940     | 3.97E-02 | KIF1A, DNALI1, MYL4, N | 172        | 142      | 12983     | 1.00000    | 0.89827   | 43.10029 |
| GOTERM_CC_FAT                                              | GO:0030286~dynein complex                  | 3     | 1.20482  | 6.71324     | 7.25E-02 | DNALI1, DNHD1, DCTN    | 168        | 34       | 12782     | 1.00000    | 0.64079   | 61.19590 |

|                                                            |                                               |       |         |             |          |                       |            |          |           |            |           |          |
|------------------------------------------------------------|-----------------------------------------------|-------|---------|-------------|----------|-----------------------|------------|----------|-----------|------------|-----------|----------|
| GOTERM_CC_FAT                                              | GO:0005875~microtubule associated comple:     | 3     | 1.20482 | 2.23775     | 3.86E-01 | DNAL1, DNHD1, DCTN    | 168        | 102      | 12782     | 1.00000    | 0.88497   | 99.78273 |
| Annotation Cluster 19 Enrichment Score: 0.9171960463158848 |                                               |       |         |             |          |                       |            |          |           |            |           |          |
| Category                                                   | Term                                          | Count | %       | Fold Enrich | PValue   | Genes                 | List Total | Pop Hits | Pop Total | Bonferroni | Benjamini | FDR      |
| INTERPRO                                                   | IPR002035:~von Willebrand factor, type A      | 4     | 1.60643 | 3.74886     | 9.04E-02 | ITIH1, ITGAE, COL12A1 | 225        | 79       | 16659     | 1.00000    | 0.88743   | 74.29394 |
| SMART                                                      | SM00327:~VWA                                  | 4     | 1.60643 | 3.50913     | 1.04E-01 | ITIH1, ITGAE, COL12A1 | 131        | 79       | 9079      | 1.00000    | 0.87993   | 71.37410 |
| UP_SEQ_FEATURE                                             | domain:~VWFA                                  | 3     | 1.20482 | 3.75944     | 1.89E-01 | ITIH1, ITGAE, CACNA2I | 246        | 62       | 19113     | 1.00000    | 0.99608   | 96.06283 |
| Annotation Cluster 20 Enrichment Score: 0.866276959238014  |                                               |       |         |             |          |                       |            |          |           |            |           |          |
| Category                                                   | Term                                          | Count | %       | Fold Enrich | PValue   | Genes                 | List Total | Pop Hits | Pop Total | Bonferroni | Benjamini | FDR      |
| GOTERM_BP_FAT                                              | GO:0010038~response to metal ion              | 5     | 2.00803 | 2.83428     | 9.93E-02 | KCNMB3, TNNT2, SERP   | 185        | 129      | 13528     | 1.00000    | 0.99704   | 81.44738 |
| GOTERM_BP_FAT                                              | GO:0010035~response to inorganic substanc     | 6     | 2.40964 | 2.14022     | 1.48E-01 | KCNMB3, TNNT2, SERP   | 185        | 205      | 13528     | 1.00000    | 0.99803   | 92.38241 |
| GOTERM_BP_FAT                                              | GO:0051592~response to calcium ion            | 3     | 1.20482 | 3.98860     | 1.72E-01 | KCNMB3, TNNT2, CAPN   | 185        | 55       | 13528     | 1.00000    | 0.99743   | 95.21212 |
| Annotation Cluster 21 Enrichment Score: 0.829324157367664  |                                               |       |         |             |          |                       |            |          |           |            |           |          |
| Category                                                   | Term                                          | Count | %       | Fold Enrich | PValue   | Genes                 | List Total | Pop Hits | Pop Total | Bonferroni | Benjamini | FDR      |
| INTERPRO                                                   | IPR000832:~GPCR, family 2, secretin-like      | 3     | 1.20482 | 4.82870     | 1.27E-01 | GPR133, GPR123, GPR   | 225        | 46       | 16659     | 1.00000    | 0.92786   | 85.72490 |
| INTERPRO                                                   | IPR017983:~GPCR, family 2, secretin-like, con | 3     | 1.20482 | 4.62750     | 1.36E-01 | GPR133, GPR123, GPR   | 225        | 48       | 16659     | 1.00000    | 0.93430   | 87.71243 |
| INTERPRO                                                   | IPR017981:~GPCR, family 2-like                | 3     | 1.20482 | 3.76475     | 1.88E-01 | GPR133, GPR123, GPR   | 225        | 59       | 16659     | 1.00000    | 0.95727   | 94.96138 |
| Annotation Cluster 22 Enrichment Score: 0.8241206941362258 |                                               |       |         |             |          |                       |            |          |           |            |           |          |
| Category                                                   | Term                                          | Count | %       | Fold Enrich | PValue   | Genes                 | List Total | Pop Hits | Pop Total | Bonferroni | Benjamini | FDR      |
| SP_PIR_KEYWORDS                                            | muscle protein                                | 4     | 1.60643 | 5.21274     | 4.11E-02 | TNNT2, MYL4, MYBPH,   | 246        | 60       | 19235     | 1.00000    | 0.45185   | 43.57146 |
| GOTERM_BP_FAT                                              | GO:0006936~muscle contraction                 | 5     | 2.00803 | 2.38968     | 1.54E-01 | TNNT2, MYL4, TRPV1, I | 185        | 153      | 13528     | 1.00000    | 0.99783   | 93.30075 |
| GOTERM_BP_FAT                                              | GO:0003012~muscle system process              | 5     | 2.00803 | 2.17632     | 1.94E-01 | TNNT2, MYL4, TRPV1, I | 185        | 168      | 13528     | 1.00000    | 0.99676   | 96.89889 |
| GOTERM_BP_FAT                                              | GO:0044057~regulation of system process       | 6     | 2.40964 | 1.41989     | 4.11E-01 | TNNT2, MYL4, THRA, P  | 185        | 309      | 13528     | 1.00000    | 0.99740   | 99.98017 |
| Annotation Cluster 23 Enrichment Score: 0.8089374355690231 |                                               |       |         |             |          |                       |            |          |           |            |           |          |
| Category                                                   | Term                                          | Count | %       | Fold Enrich | PValue   | Genes                 | List Total | Pop Hits | Pop Total | Bonferroni | Benjamini | FDR      |
| GOTERM_BP_FAT                                              | GO:0051606~detection of stimulus              | 5     | 2.00803 | 3.09849     | 7.73E-02 | KCNMB3, GNAT1, GCK    | 185        | 118      | 13528     | 1.00000    | 0.99812   | 72.66338 |
| GOTERM_BP_FAT                                              | GO:0050906~detection of stimulus involved ir  | 3     | 1.20482 | 6.09369     | 8.58E-02 | GNAT1, TRPV1, RHO     | 185        | 36       | 13528     | 1.00000    | 0.99859   | 76.44622 |
| GOTERM_BP_FAT                                              | GO:0009628~response to abiotic stimulus       | 6     | 2.40964 | 1.19224     | 5.64E-01 | GNAT1, APP, TRPV1, P  | 185        | 368      | 13528     | 1.00000    | 0.99908   | 99.99985 |
| Annotation Cluster 24 Enrichment Score: 0.808827839676675  |                                               |       |         |             |          |                       |            |          |           |            |           |          |
| Category                                                   | Term                                          | Count | %       | Fold Enrich | PValue   | Genes                 | List Total | Pop Hits | Pop Total | Bonferroni | Benjamini | FDR      |
| GOTERM_MF_FAT                                              | GO:0008092~cytoskeletal protein binding       | 11    | 4.41767 | 1.64744     | 1.29E-01 | TNS4, TNNT2, SHROOM   | 172        | 504      | 12983     | 1.00000    | 0.99301   | 85.40633 |
| GOTERM_MF_FAT                                              | GO:0003779~actin binding                      | 8     | 3.21285 | 1.85233     | 1.40E-01 | TNS4, TNNT2, SHROOM   | 172        | 326      | 12983     | 1.00000    | 0.98959   | 87.65439 |
| SP_PIR_KEYWORDS                                            | actin-binding                                 | 6     | 2.40964 | 1.89938     | 2.08E-01 | TNS4, SHROOM1, DNA    | 246        | 247      | 19235     | 1.00000    | 0.83173   | 95.84303 |
| Annotation Cluster 25 Enrichment Score: 0.7396954150941644 |                                               |       |         |             |          |                       |            |          |           |            |           |          |
| Category                                                   | Term                                          | Count | %       | Fold Enrich | PValue   | Genes                 | List Total | Pop Hits | Pop Total | Bonferroni | Benjamini | FDR      |
| GOTERM_BP_FAT                                              | GO:0051928~positive regulation of calcium io  | 3     | 1.20482 | 6.64767     | 7.38E-02 | MCHR1, P2RX3, LACRT   | 185        | 33       | 13528     | 1.00000    | 0.99835   | 70.94046 |
| GOTERM_BP_FAT                                              | GO:0010959~regulation of metal ion transpor   | 4     | 1.60643 | 3.61108     | 9.81E-02 | MCHR1, GCK, P2RX3, L  | 185        | 81       | 13528     | 1.00000    | 0.99827   | 81.07149 |
| GOTERM_BP_FAT                                              | GO:0043270~positive regulation of ion transp  | 3     | 1.20482 | 5.22317     | 1.11E-01 | MCHR1, P2RX3, LACRT   | 185        | 42       | 13528     | 1.00000    | 0.99683   | 85.08033 |
| GOTERM_BP_FAT                                              | GO:0043269~regulation of ion transport        | 4     | 1.60643 | 2.95452     | 1.52E-01 | MCHR1, GCK, P2RX3, L  | 185        | 99       | 13528     | 1.00000    | 0.99802   | 92.99689 |
| GOTERM_BP_FAT                                              | GO:0051924~regulation of calcium ion transp   | 3     | 1.20482 | 3.17932     | 2.41E-01 | MCHR1, P2RX3, LACRT   | 185        | 69       | 13528     | 1.00000    | 0.99620   | 98.83496 |
| GOTERM_BP_FAT                                              | GO:0051050~positive regulation of transport   | 5     | 2.00803 | 1.63956     | 3.60E-01 | MCHR1, SPACA3, GCK    | 185        | 223      | 13528     | 1.00000    | 0.99676   | 99.92429 |
| GOTERM_BP_FAT                                              | GO:0019932~second-messenger-mediated si       | 4     | 1.60643 | 1.24467     | 6.23E-01 | MCHR1, PTGIR, GCK, L  | 185        | 235      | 13528     | 1.00000    | 0.99943   | 99.99999 |
| Annotation Cluster 26 Enrichment Score: 0.7006199217622314 |                                               |       |         |             |          |                       |            |          |           |            |           |          |
| Category                                                   | Term                                          | Count | %       | Fold Enrich | PValue   | Genes                 | List Total | Pop Hits | Pop Total | Bonferroni | Benjamini | FDR      |
| GOTERM_CC_FAT                                              | GO:0005774~vacuolar membrane                  | 3     | 1.20482 | 4.07589     | 1.66E-01 | ATP6V1B1, ATP6V0A4,   | 168        | 56       | 12782     | 1.00000    | 0.75938   | 89.80240 |
| GOTERM_CC_FAT                                              | GO:0044437~vacuolar part                      | 3     | 1.20482 | 3.56641     | 2.04E-01 | ATP6V1B1, ATP6V0A4,   | 168        | 64       | 12782     | 1.00000    | 0.77664   | 94.29782 |
| GOTERM_CC_FAT                                              | GO:0005773~vacuole                            | 6     | 2.40964 | 1.81151     | 2.34E-01 | SPACA3, PLA2G4F, ATI  | 168        | 252      | 12782     | 1.00000    | 0.79776   | 96.49053 |
| Annotation Cluster 27 Enrichment Score: 0.6819235678949702 |                                               |       |         |             |          |                       |            |          |           |            |           |          |
| Category                                                   | Term                                          | Count | %       | Fold Enrich | PValue   | Genes                 | List Total | Pop Hits | Pop Total | Bonferroni | Benjamini | FDR      |

|               |                                            |   |         |         |          |                      |     |     |       |         |         |          |
|---------------|--------------------------------------------|---|---------|---------|----------|----------------------|-----|-----|-------|---------|---------|----------|
| GOTERM_BP_FAT | GO:0016052~carbohydrate catabolic process  | 5 | 2.00803 | 3.35433 | 6.14E-02 | SPACA3, GCK, LDHAL6  | 185 | 109 | 13528 | 1.00000 | 0.99793 | 64.00286 |
| GOTERM_BP_FAT | GO:0046164~alcohol catabolic process       | 4 | 1.60643 | 3.61108 | 9.81E-02 | GCK, LDHAL6B, TKTL1, | 185 | 81  | 13528 | 1.00000 | 0.99827 | 81.07149 |
| GOTERM_BP_FAT | GO:0044275~cellular carbohydrate catabolic | 4 | 1.60643 | 3.44114 | 1.09E-01 | GCK, LDHAL6B, PYGM,  | 185 | 85  | 13528 | 1.00000 | 0.99724 | 84.52911 |
| GOTERM_BP_FAT | GO:0006007~glucose catabolic process       | 3 | 1.20482 | 3.78229 | 1.87E-01 | GCK, LDHAL6B, TKTL1  | 185 | 58  | 13528 | 1.00000 | 0.99724 | 96.40902 |
| GOTERM_BP_FAT | GO:0019320~hexose catabolic process        | 3 | 1.20482 | 3.17932 | 2.41E-01 | GCK, LDHAL6B, TKTL1  | 185 | 69  | 13528 | 1.00000 | 0.99620 | 98.83496 |
| GOTERM_BP_FAT | GO:0046365~monosaccharide catabolic proc   | 3 | 1.20482 | 3.08976 | 2.51E-01 | GCK, LDHAL6B, TKTL1  | 185 | 71  | 13528 | 1.00000 | 0.99539 | 99.06105 |
| GOTERM_BP_FAT | GO:0006006~glucose metabolic process       | 4 | 1.60643 | 1.91175 | 3.42E-01 | GCK, LDHAL6B, PYGM,  | 185 | 153 | 13528 | 1.00000 | 0.99620 | 99.88331 |
| GOTERM_BP_FAT | GO:0019318~hexose metabolic process        | 4 | 1.60643 | 1.52342 | 4.88E-01 | GCK, LDHAL6B, PYGM,  | 185 | 192 | 13528 | 1.00000 | 0.99810 | 99.99794 |
| GOTERM_BP_FAT | GO:0005996~monosaccharide metabolic proc   | 4 | 1.60643 | 1.31756 | 5.85E-01 | GCK, LDHAL6B, PYGM,  | 185 | 222 | 13528 | 1.00000 | 0.99908 | 99.99993 |

## Annotation Cluster 28 Enrichment Score: 0.6771027625792073

| Category        | Term                                         | Count | %       | Fold Enrich | PValue   | Genes                 | List Total | Pop Hits | Pop Total | Bonferroni | Benjamini | FDR      |
|-----------------|----------------------------------------------|-------|---------|-------------|----------|-----------------------|------------|----------|-----------|------------|-----------|----------|
| INTERPRO        | IPR006187:Claudin                            | 3     | 1.20482 | 11.10600    | 2.92E-02 | CLDN18, CLDN4, CLDN   | 225        | 20       | 16659     | 1.00000    | 0.72815   | 34.57964 |
| INTERPRO        | IPR017974:Claudin, conserved site            | 3     | 1.20482 | 10.57714    | 3.20E-02 | CLDN18, CLDN4, CLDN   | 225        | 21       | 16659     | 1.00000    | 0.73019   | 37.22319 |
| GOTERM_BP_FAT   | GO:0016338~calcium-independent cell-cell ad  | 3     | 1.20482 | 9.97150     | 3.56E-02 | CLDN18, CLDN4, CLDN   | 185        | 22       | 13528     | 1.00000    | 0.99097   | 44.20888 |
| INTERPRO        | IPR004031:PMP-22/EMP/MP20/Claudin            | 3     | 1.20482 | 6.17000     | 8.42E-02 | CLDN18, CLDN4, CLDN   | 225        | 36       | 16659     | 1.00000    | 0.88095   | 71.65163 |
| KEGG_PATHWAY    | hsa04530:Tight junction                      | 5     | 2.00803 | 2.91906     | 8.73E-02 | CLDN18, EPB41L1, CLC  | 65         | 134      | 5085      | 0.99920    | 0.99920   | 61.95984 |
| GOTERM_BP_FAT   | GO:0016337~cell-cell adhesion                | 7     | 2.81124 | 1.85460     | 1.75E-01 | LGALS7B, CLDN18, THI  | 185        | 276      | 13528     | 1.00000    | 0.99683   | 95.45285 |
| SP_PIR_KEYWORDS | Tight junction                               | 3     | 1.20482 | 3.84546     | 1.82E-01 | CLDN18, CLDN4, CLDN   | 246        | 61       | 19235     | 1.00000    | 0.81523   | 93.57851 |
| GOTERM_CC_FAT   | GO:0070160~occluding junction                | 3     | 1.20482 | 3.12671     | 2.47E-01 | CLDN18, CLDN4, CLDN   | 168        | 73       | 12782     | 1.00000    | 0.79971   | 97.17942 |
| GOTERM_CC_FAT   | GO:0005923~tight junction                    | 3     | 1.20482 | 3.12671     | 2.47E-01 | CLDN18, CLDN4, CLDN   | 168        | 73       | 12782     | 1.00000    | 0.79971   | 97.17942 |
| GOTERM_CC_FAT   | GO:0043296~apical junction complex           | 3     | 1.20482 | 2.30556     | 3.72E-01 | CLDN18, CLDN4, CLDN   | 168        | 99       | 12782     | 1.00000    | 0.88426   | 99.71157 |
| GOTERM_CC_FAT   | GO:0016327~apicolateral plasma membrane      | 3     | 1.20482 | 2.23775     | 3.86E-01 | CLDN18, CLDN4, CLDN   | 168        | 102      | 12782     | 1.00000    | 0.88497   | 99.78273 |
| KEGG_PATHWAY    | hsa04670:Leukocyte transendothelial migratic | 3     | 1.20482 | 1.98892     | 4.40E-01 | CLDN18, CLDN4, CLDN   | 65         | 118      | 5085      | 1.00000    | 0.99988   | 99.78346 |
| KEGG_PATHWAY    | hsa04514:Cell adhesion molecules (CAMs)      | 3     | 1.20482 | 1.77797     | 4.99E-01 | CLDN18, CLDN4, CLDN   | 65         | 132      | 5085      | 1.00000    | 0.99987   | 99.93274 |
| SP_PIR_KEYWORDS | cell junction                                | 6     | 2.40964 | 1.17581     | 5.77E-01 | TNS4, CLDN18, LIMS2,  | 246        | 399      | 19235     | 1.00000    | 0.97292   | 99.99920 |
| GOTERM_CC_FAT   | GO:0030054~cell junction                     | 7     | 2.81124 | 1.02815     | 6.75E-01 | TNS4, CLDN18, LIMS2,  | 168        | 518      | 12782     | 1.00000    | 0.98213   | 99.99993 |
| GOTERM_CC_FAT   | GO:0005911~cell-cell junction                | 3     | 1.20482 | 1.20132     | 7.13E-01 | CLDN18, CLDN4, CLDN   | 168        | 190      | 12782     | 1.00000    | 0.98572   | 99.99999 |
| GOTERM_MF_FAT   | GO:0042802~identical protein binding         | 8     | 3.21285 | 0.94353     | 7.45E-01 | APP, CLDN18, SP100, T | 172        | 640      | 12983     | 1.00000    | 0.99968   | #####    |

## Annotation Cluster 29 Enrichment Score: 0.6657870485863008

| Category        | Term                                         | Count | %       | Fold Enrich | PValue   | Genes                | List Total | Pop Hits | Pop Total | Bonferroni | Benjamini | FDR      |
|-----------------|----------------------------------------------|-------|---------|-------------|----------|----------------------|------------|----------|-----------|------------|-----------|----------|
| INTERPRO        | IPR003054:Type II keratin                    | 3     | 1.20482 | 7.93286     | 5.41E-02 | KRT82, KRT74, FCN2   | 225        | 28       | 16659     | 1.00000    | 0.83394   | 54.95957 |
| INTERPRO        | IPR016044:Filament                           | 4     | 1.60643 | 4.11333     | 7.29E-02 | KRT82, KRT37, KRT74, | 225        | 72       | 16659     | 1.00000    | 0.86930   | 66.20205 |
| SP_PIR_KEYWORDS | Intermediate filament                        | 4     | 1.60643 | 4.00980     | 7.75E-02 | KRT82, KRT37, KRT74, | 246        | 78       | 19235     | 1.00000    | 0.61615   | 66.75139 |
| UP_SEQ_FEATURE  | region of interest:Linker 12                 | 3     | 1.20482 | 3.64196     | 1.98E-01 | KRT82, KRT37, KRT74  | 246        | 64       | 19113     | 1.00000    | 0.99655   | 96.70591 |
| UP_SEQ_FEATURE  | region of interest:Coil 2                    | 3     | 1.20482 | 3.64196     | 1.98E-01 | KRT82, KRT37, KRT74  | 246        | 64       | 19113     | 1.00000    | 0.99655   | 96.70591 |
| UP_SEQ_FEATURE  | region of interest:Coil 1A                   | 3     | 1.20482 | 3.32979     | 2.26E-01 | KRT82, KRT37, KRT74  | 246        | 70       | 19113     | 1.00000    | 0.99720   | 98.10610 |
| UP_SEQ_FEATURE  | region of interest:Linker 1                  | 3     | 1.20482 | 3.32979     | 2.26E-01 | KRT82, KRT37, KRT74  | 246        | 70       | 19113     | 1.00000    | 0.99720   | 98.10610 |
| UP_SEQ_FEATURE  | region of interest:Coil 1B                   | 3     | 1.20482 | 3.32979     | 2.26E-01 | KRT82, KRT37, KRT74  | 246        | 70       | 19113     | 1.00000    | 0.99720   | 98.10610 |
| UP_SEQ_FEATURE  | region of interest:Rod                       | 3     | 1.20482 | 3.28289     | 2.31E-01 | KRT82, KRT37, KRT74  | 246        | 71       | 19113     | 1.00000    | 0.99715   | 98.27746 |
| UP_SEQ_FEATURE  | region of interest:Head                      | 3     | 1.20482 | 3.19295     | 2.40E-01 | KRT82, KRT37, KRT74  | 246        | 73       | 19113     | 1.00000    | 0.99747   | 98.57811 |
| PIR_SUPERFAMILY | PIRSF002282:cytoskeletal keratin             | 3     | 1.20482 | 3.10887     | 2.48E-01 | KRT82, KRT37, KRT74  | 117        | 61       | 7396      | 1.00000    | 0.99999   | 96.35422 |
| UP_SEQ_FEATURE  | region of interest:Tail                      | 3     | 1.20482 | 3.10780     | 2.50E-01 | KRT82, KRT37, KRT74  | 246        | 75       | 19113     | 1.00000    | 0.99699   | 98.82953 |
| INTERPRO        | IPR018039:Intermediate filament protein, con | 3     | 1.20482 | 3.08500     | 2.52E-01 | KRT82, KRT37, KRT74  | 225        | 72       | 16659     | 1.00000    | 0.97997   | 98.45421 |
| INTERPRO        | IPR001664:Intermediate filament protein      | 3     | 1.20482 | 3.04274     | 2.57E-01 | KRT82, KRT37, FCN2   | 225        | 73       | 16659     | 1.00000    | 0.97961   | 98.59568 |
| GOTERM_CC_FAT   | GO:0045095~keratin filament                  | 3     | 1.20482 | 2.59375     | 3.20E-01 | KRT82, KRT74, FCN2   | 168        | 88       | 12782     | 1.00000    | 0.85287   | 99.21193 |
| GOTERM_CC_FAT   | GO:0005882~intermediate filament             | 4     | 1.60643 | 1.66302     | 4.29E-01 | KRT82, KRT37, KRT74, | 168        | 183      | 12782     | 1.00000    | 0.90319   | 99.91348 |
| GOTERM_CC_FAT   | GO:0004511~intermediate filament cytoskelel  | 4     | 1.60643 | 1.62745     | 4.43E-01 | KRT82, KRT37, KRT74, | 168        | 187      | 12782     | 1.00000    | 0.90369   | 99.93617 |
| SP_PIR_KEYWORDS | keratin                                      | 3     | 1.20482 | 1.62898     | 5.50E-01 | KRT82, KRT37, KRT74  | 246        | 144      | 19235     | 1.00000    | 0.96902   | 99.99813 |

## Annotation Cluster 30 Enrichment Score: 0.6519596368796196

| Category        | Term                           | Count | %        | Fold Enrich | PValue   | Genes                 | List Total | Pop Hits | Pop Total | Bonferroni | Benjamini | FDR     |
|-----------------|--------------------------------|-------|----------|-------------|----------|-----------------------|------------|----------|-----------|------------|-----------|---------|
| GOTERM_MF_FAT   | GO:0005509~calcium ion binding | 26    | 10.44177 | 2.13552     | 4.15E-04 | MYL4, TRPV1, ITGAE, S | 172        | 919      | 12983     | 0.15116    | 0.07867   | 0.57598 |
| SP_PIR_KEYWORDS | calcium                        | 22    | 8.83534  | 2.14222     | 1.50E-03 | TRPV1, ITGAE, SRL, C  | 246        | 803      | 19235     | 0.40250    | 0.05562   | 2.02160 |
| GOTERM_MF_FAT   | GO:0043167~ion binding         | 53    | 21.28514 | 0.94331     | 7.61E-01 | APOBEC2, THRA, TRP\   | 172        | 4241     | 12983     | 1.00000    | 0.99973   | #####   |
| GOTERM_MF_FAT   | GO:0046872~metal ion binding   | 51    | 20.48193 | 0.92986     | 7.96E-01 | APOBEC2, THRA, TRP\   | 172        | 4140     | 12983     | 1.00000    | 0.99982   | #####   |

|                 |                                         |    |          |         |          |                       |     |      |       |         |         |       |
|-----------------|-----------------------------------------|----|----------|---------|----------|-----------------------|-----|------|-------|---------|---------|-------|
| GOTERM_MF_FAT   | GO:0043169~cation binding               | 51 | 20.48193 | 0.92118 | 8.19E-01 | APOBEC2, THRA, TRPV   | 172 | 4179 | 12983 | 1.00000 | 0.99988 | ##### |
| SP_PIR_KEYWORDS | metal-binding                           | 28 | 11.24498 | 0.73666 | 9.82E-01 | FGD2, APOBEC2, LIMS   | 246 | 2972 | 19235 | 1.00000 | 1.00000 | ##### |
| SP_PIR_KEYWORDS | zinc                                    | 14 | 5.62249  | 0.50008 | 1.00E+00 | APOBEC2, FGD2, BRD1   | 246 | 2189 | 19235 | 1.00000 | 1.00000 | ##### |
| GOTERM_MF_FAT   | GO:0046914~transition metal ion binding | 20 | 8.03213  | 0.54207 | 1.00E+00 | FGD2, APOBEC2, BRD1   | 172 | 2785 | 12983 | 1.00000 | 1.00000 | ##### |
| GOTERM_MF_FAT   | GO:0008270~zinc ion binding             | 14 | 5.62249  | 0.45727 | 1.00E+00 | APOBEC2, FGD2, BRD1   | 172 | 2311 | 12983 | 1.00000 | 1.00000 | ##### |
| SP_PIR_KEYWORDS | zinc-finger                             | 7  | 2.81124  | 0.31859 | 1.00E+00 | FGD2, BRD1, TCF20, TI | 246 | 1718 | 19235 | 1.00000 | 1.00000 | ##### |

## Annotation Cluster 31 Enrichment Score: 0.6390877892113517

| Category        | Term                                        | Count | %        | Fold Enrich | PValue   | Genes               | List Total | Pop Hits | Pop Total | Bonferroni | Benjamini | FDR      |
|-----------------|---------------------------------------------|-------|----------|-------------|----------|---------------------|------------|----------|-----------|------------|-----------|----------|
| GOTERM_MF_FAT   | GO:0022838~substrate specific channel activ | 11    | 4.41767  | 2.08620     | 3.79E-02 | KCNMB3, TTYH3, TRPV | 172        | 398      | 12983     | 1.00000    | 0.92146   | 41.61014 |
| GOTERM_MF_FAT   | GO:0015267~channel activity                 | 11    | 4.41767  | 2.01531     | 4.61E-02 | KCNMB3, TTYH3, TRPV | 172        | 412      | 12983     | 1.00000    | 0.90266   | 48.15240 |
| GOTERM_MF_FAT   | GO:0022803~passive transmembrane transp     | 11    | 4.41767  | 2.01043     | 4.67E-02 | KCNMB3, TTYH3, TRPV | 172        | 413      | 12983     | 1.00000    | 0.87748   | 48.62444 |
| SP_PIR_KEYWORDS | ionic channel                               | 8     | 3.21285  | 1.96707     | 1.13E-01 | KCNMB3, TTYH3, TRPV | 246        | 318      | 19235     | 1.00000    | 0.71319   | 80.49342 |
| SP_PIR_KEYWORDS | transport                                   | 28    | 11.24498 | 1.31099     | 1.18E-01 | RBP5, KCNMB3, AQP8, | 246        | 1670     | 19235     | 1.00000    | 0.70971   | 82.03470 |
| SP_PIR_KEYWORDS | ion transport                               | 12    | 4.81928  | 1.62334     | 1.22E-01 | KCNMB3, TTYH3, TRPV | 246        | 578      | 19235     | 1.00000    | 0.70135   | 83.02044 |
| GOTERM_MF_FAT   | GO:0005216~ion channel activity             | 9     | 3.61446  | 1.75996     | 1.38E-01 | KCNMB3, TTYH3, TRPV | 172        | 386      | 12983     | 1.00000    | 0.99240   | 87.30087 |
| SP_PIR_KEYWORDS | chloride channel                            | 3     | 1.20482  | 4.18881     | 1.60E-01 | TTYH3, CLCNKA, CLCN | 246        | 56       | 19235     | 1.00000    | 0.79286   | 90.67494 |
| GOTERM_CC_FAT   | GO:0034707~chloride channel complex         | 3     | 1.20482  | 4.15000     | 1.61E-01 | TTYH3, CLCNKA, CLCN | 168        | 55       | 12782     | 1.00000    | 0.76223   | 89.06883 |
| GOTERM_MF_FAT   | GO:0005254~chloride channel activity        | 3     | 1.20482  | 3.14511     | 2.45E-01 | TTYH3, CLCNKA, CLCN | 172        | 72       | 12983     | 1.00000    | 0.99791   | 98.00282 |
| SP_PIR_KEYWORDS | chloride                                    | 3     | 1.20482  | 3.12764     | 2.48E-01 | TTYH3, CLCNKA, CLCN | 246        | 75       | 19235     | 1.00000    | 0.85329   | 97.93842 |
| GOTERM_MF_FAT   | GO:0031404~chloride ion binding             | 3     | 1.20482  | 2.94088     | 2.69E-01 | TTYH3, CLCNKA, CLCN | 172        | 77       | 12983     | 1.00000    | 0.99797   | 98.73707 |
| GOTERM_MF_FAT   | GO:0005253~anion channel activity           | 3     | 1.20482  | 2.90318     | 2.74E-01 | TTYH3, CLCNKA, CLCN | 172        | 78       | 12983     | 1.00000    | 0.99760   | 98.84984 |
| GOTERM_CC_FAT   | GO:0034702~ion channel complex              | 5     | 2.00803  | 1.85569     | 2.83E-01 | KCNMB3, TTYH3, KCTE | 168        | 205      | 12782     | 1.00000    | 0.83253   | 98.47873 |
| GOTERM_MF_FAT   | GO:0005261~cation channel activity          | 6     | 2.40964  | 1.64689     | 2.96E-01 | KCNMB3, TRPV1, P2RX | 172        | 275      | 12983     | 1.00000    | 0.99693   | 99.25231 |
| GOTERM_BP_FAT   | GO:0006812~cation transport                 | 10    | 4.01606  | 1.32232     | 3.39E-01 | KCNMB3, TRPV1, SLC3 | 185        | 553      | 13528     | 1.00000    | 0.99643   | 99.87368 |
| GOTERM_MF_FAT   | GO:0043168~anion binding                    | 3     | 1.20482  | 2.46139     | 3.42E-01 | TTYH3, CLCNKA, CLCN | 172        | 92       | 12983     | 1.00000    | 0.99828   | 99.70769 |
| GOTERM_BP_FAT   | GO:0006811~ion transport                    | 13    | 5.22088  | 1.23778     | 3.52E-01 | KCNMB3, SLC38A8, TR | 185        | 768      | 13528     | 1.00000    | 0.99648   | 99.90904 |
| GOTERM_MF_FAT   | GO:0022836~gated channel activity           | 6     | 2.40964  | 1.46095     | 3.88E-01 | KCNMB3, P2RX3, KCTE | 172        | 310      | 12983     | 1.00000    | 0.99843   | 99.89171 |
| GOTERM_MF_FAT   | GO:0046873~metal ion transmembrane trans    | 6     | 2.40964  | 1.38078     | 4.35E-01 | KCNMB3, TRPV1, P2RX | 172        | 328      | 12983     | 1.00000    | 0.99912   | 99.96435 |
| GOTERM_BP_FAT   | GO:0015672~monovalent inorganic cation tra  | 6     | 2.40964  | 1.37970     | 4.35E-01 | KCNMB3, SLC38A8, KC | 185        | 318      | 13528     | 1.00000    | 0.99772   | 99.99004 |
| GOTERM_MF_FAT   | GO:0005244~voltage-gated ion channel activ  | 4     | 1.60643  | 1.54836     | 4.74E-01 | KCTD1, CLCNKA, CLCN | 172        | 195      | 12983     | 1.00000    | 0.99943   | 99.98692 |
| GOTERM_MF_FAT   | GO:0022832~voltage-gated channel activity   | 4     | 1.60643  | 1.54836     | 4.74E-01 | KCTD1, CLCNKA, CLCN | 172        | 195      | 12983     | 1.00000    | 0.99943   | 99.98692 |
| SP_PIR_KEYWORDS | voltage-gated channel                       | 3     | 1.20482  | 1.56382     | 5.72E-01 | CLCNKA, CLCNKB, CA  | 246        | 150      | 19235     | 1.00000    | 0.97396   | 99.99906 |
| GOTERM_MF_FAT   | GO:0008509~anion transmembrane transport    | 3     | 1.20482  | 1.54046     | 5.80E-01 | TTYH3, CLCNKA, CLCN | 172        | 147      | 12983     | 1.00000    | 0.99941   | 99.99943 |
| GOTERM_BP_FAT   | GO:0030001~metal ion transport              | 7     | 2.81124  | 1.10080     | 6.10E-01 | KCNMB3, TRPV1, SLC3 | 185        | 465      | 13528     | 1.00000    | 0.99929   | 99.99997 |

## Annotation Cluster 32 Enrichment Score: 0.6328372494847919

| Category        | Term                                     | Count | %        | Fold Enrich | PValue   | Genes               | List Total | Pop Hits | Pop Total | Bonferroni | Benjamini | FDR      |
|-----------------|------------------------------------------|-------|----------|-------------|----------|---------------------|------------|----------|-----------|------------|-----------|----------|
| GOTERM_CC_FAT   | GO:0044430~cytoskeletal part             | 19    | 7.63052  | 1.51847     | 7.20E-02 | SHROOM1, MYL4, CRC  | 168        | 952      | 12782     | 1.00000    | 0.66351   | 60.93444 |
| SP_PIR_KEYWORDS | cytoskeleton                             | 13    | 5.22088  | 1.59824     | 1.14E-01 | FGD2, SHROOM1, SEP  | 246        | 636      | 19235     | 1.00000    | 0.70752   | 80.93941 |
| GOTERM_CC_FAT   | GO:0005856~cytoskeleton                  | 24    | 9.63855  | 1.32223     | 1.33E-01 | FGD2, SHROOM1, MYL  | 168        | 1381     | 12782     | 1.00000    | 0.73354   | 83.36141 |
| GOTERM_CC_FAT   | GO:0015630~microtubule cytoskeleton      | 11    | 4.41767  | 1.52444     | 1.82E-01 | SHROOM1, APP, KIF1A | 168        | 549      | 12782     | 1.00000    | 0.75626   | 91.98152 |
| GOTERM_CC_FAT   | GO:0043228~non-membrane-bounded organ    | 29    | 11.64659 | 0.84993     | 8.95E-01 | FGD2, MEAF6, SHROO  | 168        | 2596     | 12782     | 1.00000    | 0.99860   | #####    |
| GOTERM_CC_FAT   | GO:0043232~intracellular non-membrane-bo | 29    | 11.64659 | 0.84993     | 8.95E-01 | FGD2, MEAF6, SHROO  | 168        | 2596     | 12782     | 1.00000    | 0.99860   | #####    |

## Annotation Cluster 33 Enrichment Score: 0.6327495045537525

| Category        | Term                             | Count | %       | Fold Enrich | PValue   | Genes                 | List Total | Pop Hits | Pop Total | Bonferroni | Benjamini | FDR      |
|-----------------|----------------------------------|-------|---------|-------------|----------|-----------------------|------------|----------|-----------|------------|-----------|----------|
| GOTERM_BP_FAT   | GO:0006915~apoptosis             | 12    | 4.81928 | 1.45763     | 1.98E-01 | FGD2, LY86, LGALS7, I | 185        | 602      | 13528     | 1.00000    | 0.99532   | 97.11794 |
| GOTERM_BP_FAT   | GO:0012501~programmed cell death | 12    | 4.81928 | 1.43616     | 2.11E-01 | FGD2, LY86, LGALS7, I | 185        | 611      | 13528     | 1.00000    | 0.99559   | 97.78674 |
| SP_PIR_KEYWORDS | Apoptosis                        | 8     | 3.21285 | 1.64181     | 2.14E-01 | TNS4, DNASE1, APP, T  | 246        | 381      | 19235     | 1.00000    | 0.82849   | 96.26038 |
| GOTERM_BP_FAT   | GO:0008219~cell death            | 13    | 5.22088 | 1.32214     | 2.74E-01 | FGD2, LY86, LGALS7, I | 185        | 719      | 13528     | 1.00000    | 0.99655   | 99.42177 |
| GOTERM_BP_FAT   | GO:0016265~death                 | 13    | 5.22088 | 1.31301     | 2.81E-01 | FGD2, LY86, LGALS7, I | 185        | 724      | 13528     | 1.00000    | 0.99632   | 99.51383 |

## Annotation Cluster 34 Enrichment Score: 0.6161177437785431

| Category      | Term                               | Count | %       | Fold Enrich | PValue   | Genes                | List Total | Pop Hits | Pop Total | Bonferroni | Benjamini | FDR      |
|---------------|------------------------------------|-------|---------|-------------|----------|----------------------|------------|----------|-----------|------------|-----------|----------|
| GOTERM_BP_FAT | GO:0006959~humoral immune response | 4     | 1.60643 | 3.70250     | 9.27E-02 | CCR6, FCN2, LY86, C1 | 185        | 79       | 13528     | 1.00000    | 0.99821   | 79.15167 |
| GOTERM_BP_FAT | GO:0045087~innate immune response  | 5     | 2.00803 | 2.64943     | 1.19E-01 | TMEM173, SP100, FCN  | 185        | 138      | 13528     | 1.00000    | 0.99735   | 87.04522 |

|                 |                                  |    |         |         |          |                      |     |     |       |         |         |          |
|-----------------|----------------------------------|----|---------|---------|----------|----------------------|-----|-----|-------|---------|---------|----------|
| SP_PIR_KEYWORDS | innate immunity                  | 3  | 1.20482 | 3.00735 | 2.62E-01 | TMEM173, FCN2, C1S   | 246 | 78  | 19235 | 1.00000 | 0.85023 | 98.40941 |
| GOTERM_BP_FAT   | GO:0006954~inflammatory response | 7  | 2.81124 | 1.57499 | 2.78E-01 | ORM1, TRPV1, FCN2, L | 185 | 325 | 13528 | 1.00000 | 0.99632 | 99.47573 |
| GOTERM_BP_FAT   | GO:0006955~immune response       | 11 | 4.41767 | 1.16575 | 4.65E-01 | TMEM173, CCR6, IL18E | 185 | 690 | 13528 | 1.00000 | 0.99797 | 99.99578 |
| SP_PIR_KEYWORDS | immune response                  | 4  | 1.60643 | 1.39627 | 5.38E-01 | TMEM173, FCN2, LY86, | 246 | 224 | 19235 | 1.00000 | 0.96684 | 99.99735 |

## Annotation Cluster 35 Enrichment Score: 0.6096154397284032

| Category      | Term                                       | Count | %       | Fold Enrich | PValue   | Genes                 | List Total | Pop Hits | Pop Total | Bonferroni | Benjamini | FDR      |
|---------------|--------------------------------------------|-------|---------|-------------|----------|-----------------------|------------|----------|-----------|------------|-----------|----------|
| GOTERM_BP_FAT | GO:0010033~response to organic substance   | 18    | 7.22892 | 1.82557     | 1.92E-02 | SP100, THRA, IL1RN, C | 185        | 721      | 13528     | 1.00000    | 0.97716   | 26.82695 |
| GOTERM_BP_FAT | GO:0009755~hormone-mediated signaling      | 3     | 1.20482 | 4.21871     | 1.57E-01 | THRA, PRKAR1B, CUZI   | 185        | 52       | 13528     | 1.00000    | 0.99770   | 93.67357 |
| GOTERM_BP_FAT | GO:0009725~response to hormone stimulus    | 7     | 2.81124 | 1.39474     | 3.83E-01 | THRA, PRKAR1B, IL1R1  | 185        | 367      | 13528     | 1.00000    | 0.99702   | 99.95775 |
| GOTERM_BP_FAT | GO:0009719~response to endogenous stimul   | 7     | 2.81124 | 1.26388     | 4.74E-01 | THRA, PRKAR1B, IL1R1  | 185        | 405      | 13528     | 1.00000    | 0.99801   | 99.99686 |
| GOTERM_BP_FAT | GO:0032870~cellular response to hormone st | 3     | 1.20482 | 1.64942     | 5.43E-01 | THRA, PRKAR1B, CUZI   | 185        | 133      | 13528     | 1.00000    | 0.99892   | 99.99967 |
| GOTERM_BP_FAT | GO:0048545~response to steroid hormone st  | 3     | 1.20482 | 1.14257     | 7.39E-01 | IL1RN, SERPINA1, TFF  | 185        | 192      | 13528     | 1.00000    | 0.99989   | #####    |

## Annotation Cluster 36 Enrichment Score: 0.5697520389297343

| Category        | Term                                        | Count | %       | Fold Enrich | PValue   | Genes                 | List Total | Pop Hits | Pop Total | Bonferroni | Benjamini | FDR      |
|-----------------|---------------------------------------------|-------|---------|-------------|----------|-----------------------|------------|----------|-----------|------------|-----------|----------|
| GOTERM_CC_FAT   | GO:0016323~basolateral plasma membrane      | 6     | 2.40964 | 2.24877     | 1.27E-01 | TNS4, LIMS2, ANK1, AF | 168        | 203      | 12782     | 1.00000    | 0.73325   | 81.92283 |
| GOTERM_CC_FAT   | GO:0005925~focal adhesion                   | 4     | 1.60643 | 2.98366     | 1.49E-01 | TNS4, LIMS2, ARHGEF   | 168        | 102      | 12782     | 1.00000    | 0.76043   | 86.81111 |
| GOTERM_CC_FAT   | GO:0005924~cell-substrate adherens junction | 4     | 1.60643 | 2.87107     | 1.61E-01 | TNS4, LIMS2, ARHGEF   | 168        | 106      | 12782     | 1.00000    | 0.77569   | 89.04386 |
| GOTERM_CC_FAT   | GO:0030055~cell-substrate junction          | 4     | 1.60643 | 2.71726     | 1.81E-01 | TNS4, LIMS2, ARHGEF   | 168        | 112      | 12782     | 1.00000    | 0.76553   | 91.81874 |
| GOTERM_CC_FAT   | GO:0005912~adherens junction                | 4     | 1.60643 | 1.96344     | 3.30E-01 | TNS4, LIMS2, ARHGEF   | 168        | 155      | 12782     | 1.00000    | 0.85703   | 99.34987 |
| GOTERM_CC_FAT   | GO:0070161~anchoring junction               | 4     | 1.60643 | 1.76938     | 3.91E-01 | TNS4, LIMS2, ARHGEF   | 168        | 172      | 12782     | 1.00000    | 0.88357   | 99.80308 |
| SP_PIR_KEYWORDS | cell junction                               | 6     | 2.40964 | 1.17581     | 5.77E-01 | TNS4, CLDN18, LIMS2,  | 246        | 399      | 19235     | 1.00000    | 0.97292   | 99.99920 |
| GOTERM_CC_FAT   | GO:0030054~cell junction                    | 7     | 2.81124 | 1.02815     | 6.75E-01 | TNS4, CLDN18, LIMS2,  | 168        | 518      | 12782     | 1.00000    | 0.98213   | 99.99993 |

## Annotation Cluster 37 Enrichment Score: 0.5640589805343672

| Category        | Term                                         | Count | %        | Fold Enrich | PValue   | Genes               | List Total | Pop Hits | Pop Total | Bonferroni | Benjamini | FDR      |
|-----------------|----------------------------------------------|-------|----------|-------------|----------|---------------------|------------|----------|-----------|------------|-----------|----------|
| SP_PIR_KEYWORDS | receptor                                     | 31    | 12.44980 | 1.53122     | 1.85E-02 | MCHR1, THRA, OR2T2, | 246        | 1583     | 19235     | 0.99836    | 0.34783   | 22.45104 |
| SP_PIR_KEYWORDS | transducer                                   | 19    | 7.63052  | 1.69981     | 3.11E-02 | GNAT1, MCHR1, OR2A  | 246        | 874      | 19235     | 0.99998    | 0.45281   | 34.97515 |
| SP_PIR_KEYWORDS | g-protein coupled receptor                   | 18    | 7.22892  | 1.72480     | 3.24E-02 | MCHR1, OR2A5, OR2T  | 246        | 816      | 19235     | 0.99999    | 0.43283   | 36.22259 |
| GOTERM_BP_FAT   | GO:0050890~cognition                         | 17    | 6.82731  | 1.36756     | 1.74E-01 | GNAT1, SLC45A2, OR2 | 185        | 909      | 13528     | 1.00000    | 0.99725   | 95.43323 |
| INTERPRO        | IPR017452:GPCR, rhodopsin-like superfamily   | 14    | 5.62249  | 1.42777     | 1.81E-01 | MCHR1, OR2A5, OR2T  | 225        | 726      | 16659     | 1.00000    | 0.95979   | 94.24649 |
| INTERPRO        | IPR000276:7TM GPCR, rhodopsin-like           | 14    | 5.62249  | 1.42580     | 1.82E-01 | MCHR1, OR2A5, OR2T  | 225        | 727      | 16659     | 1.00000    | 0.95646   | 94.37199 |
| GOTERM_BP_FAT   | GO:0007186~G-protein coupled receptor prot   | 20    | 8.03213  | 1.30230     | 1.90E-01 | GNAT1, MCHR1, OR2A  | 185        | 1123     | 13528     | 1.00000    | 0.99718   | 96.65087 |
| SP_PIR_KEYWORDS | cell membrane                                | 33    | 13.25301 | 1.17607     | 2.32E-01 | MCHR1, CLDN18, LIMS | 246        | 2194     | 19235     | 1.00000    | 0.84367   | 97.28413 |
| GOTERM_BP_FAT   | GO:0007600~sensory perception                | 14    | 5.62249  | 1.26388     | 3.09E-01 | GNAT1, SLC45A2, OR2 | 185        | 810      | 13528     | 1.00000    | 0.99662   | 99.74091 |
| GOTERM_BP_FAT   | GO:0050877~neurological system process       | 19    | 7.63052  | 1.14823     | 3.81E-01 | GNAT1, KCNMB3, SLC  | 185        | 1210     | 13528     | 1.00000    | 0.99728   | 99.95597 |
| PIR_SUPERFAMILY | PIRSF800006:rhodopsin-like G protein-couple  | 13    | 5.22088  | 1.19793     | 3.90E-01 | MCHR1, OR2A5, OR2T  | 117        | 686      | 7396      | 1.00000    | 1.00000   | 99.67970 |
| GOTERM_BP_FAT   | GO:0007606~sensory perception of chemical    | 8     | 3.21285  | 1.22384     | 4.76E-01 | GNAT1, OR2A5, OR2T  | 185        | 478      | 13528     | 1.00000    | 0.99795   | 99.99697 |
| SP_PIR_KEYWORDS | sensory transduction                         | 9     | 3.61446  | 1.18272     | 4.88E-01 | GNAT1, SLC45A2, OR2 | 246        | 595      | 19235     | 1.00000    | 0.95549   | 99.98919 |
| KEGG_PATHWAY    | hsa04740:Olfactory transduction              | 6     | 2.40964  | 1.23848     | 5.25E-01 | OR2A5, OR2T2, OR6B3 | 65         | 379      | 5085      | 1.00000    | 0.99975   | 99.96162 |
| GOTERM_BP_FAT   | GO:0007166~cell surface receptor linked sigr | 26    | 10.44177 | 1.02437     | 5.54E-01 | MCHR1, OR2T2, TRPV1 | 185        | 1856     | 13528     | 1.00000    | 0.99899   | 99.99978 |
| SP_PIR_KEYWORDS | olfaction                                    | 5     | 2.00803  | 0.95588     | 7.68E-01 | OR2A5, OR2T2, OR6B3 | 246        | 409      | 19235     | 1.00000    | 0.99524   | #####    |
| PIR_SUPERFAMILY | PIRSF003152:G protein-coupled olfactory rec  | 5     | 2.00803  | 0.89538     | 8.11E-01 | OR2A5, OR2T2, OR6B3 | 117        | 353      | 7396      | 1.00000    | 1.00000   | #####    |
| GOTERM_MF_FAT   | GO:0004984~olfactory receptor activity       | 5     | 2.00803  | 0.87567     | 8.24E-01 | OR2A5, OR2T2, OR6B3 | 172        | 431      | 12983     | 1.00000    | 0.99985   | #####    |
| INTERPRO        | IPR000725:Olfactory receptor                 | 5     | 2.00803  | 0.86495     | 8.31E-01 | OR2A5, OR2T2, OR6B3 | 225        | 428      | 16659     | 1.00000    | 1.00000   | #####    |
| GOTERM_BP_FAT   | GO:0007608~sensory perception of smell       | 5     | 2.00803  | 0.84831     | 8.42E-01 | OR2A5, OR2T2, OR6B3 | 185        | 431      | 13528     | 1.00000    | 0.99999   | #####    |

## Annotation Cluster 38 Enrichment Score: 0.5465034385059866

| Category      | Term                                    | Count | %       | Fold Enrich | PValue   | Genes                | List Total | Pop Hits | Pop Total | Bonferroni | Benjamini | FDR      |
|---------------|-----------------------------------------|-------|---------|-------------|----------|----------------------|------------|----------|-----------|------------|-----------|----------|
| GOTERM_CC_FAT | GO:0005929~cilium                       | 6     | 2.40964 | 3.53876     | 2.70E-02 | GNAT1, MCHR1, APP, C | 168        | 129      | 12782     | 0.99627    | 0.55010   | 29.15228 |
| GOTERM_BP_FAT | GO:0009416~response to light stimulus   | 3     | 1.20482 | 1.58966     | 5.63E-01 | GNAT1, APP, RHO      | 185        | 138      | 13528     | 1.00000    | 0.99910   | 99.99984 |
| GOTERM_BP_FAT | GO:0009628~response to abiotic stimulus | 6     | 2.40964 | 1.19224     | 5.64E-01 | GNAT1, APP, TRPV1, P | 185        | 368      | 13528     | 1.00000    | 0.99908   | 99.99985 |
| GOTERM_BP_FAT | GO:0009314~response to radiation        | 3     | 1.20482 | 1.09686     | 7.59E-01 | GNAT1, APP, RHO      | 185        | 200      | 13528     | 1.00000    | 0.99993   | #####    |

## Annotation Cluster 39 Enrichment Score: 0.5253630073748161

| Category | Term | Count | % | Fold Enrich | PValue | Genes | List Total | Pop Hits | Pop Total | Bonferroni | Benjamini | FDR |
|----------|------|-------|---|-------------|--------|-------|------------|----------|-----------|------------|-----------|-----|
|----------|------|-------|---|-------------|--------|-------|------------|----------|-----------|------------|-----------|-----|

|               |                                              |   |         |         |          |                      |     |     |       |         |         |          |
|---------------|----------------------------------------------|---|---------|---------|----------|----------------------|-----|-----|-------|---------|---------|----------|
| GOTERM_BP_FAT | GO:0006164~purine nucleotide biosynthetic p  | 5 | 2.00803 | 2.47042 | 1.43E-01 | ATP9A, ATP6V1B1, ATF | 185 | 148 | 13528 | 1.00000 | 0.99842 | 91.68253 |
| GOTERM_MF_FAT | GO:0042626~ATPase activity, coupled to trar  | 4 | 1.60643 | 2.77000 | 1.74E-01 | ATP9A, ATP6V1B1, ATF | 172 | 109 | 12983 | 1.00000 | 0.99540 | 92.97440 |
| GOTERM_MF_FAT | GO:0043492~ATPase activity, coupled to mo    | 4 | 1.60643 | 2.74482 | 1.77E-01 | ATP9A, ATP6V1B1, ATF | 172 | 110 | 12983 | 1.00000 | 0.99407 | 93.35063 |
| GOTERM_MF_FAT | GO:0016820~hydrolase activity, acting on aci | 4 | 1.60643 | 2.72009 | 1.80E-01 | ATP9A, ATP6V1B1, ATF | 172 | 111 | 12983 | 1.00000 | 0.99259 | 93.70990 |
| GOTERM_BP_FAT | GO:0009152~purine ribonucleotide biosynthe   | 4 | 1.60643 | 2.49998 | 2.13E-01 | ATP9A, ATP6V1B1, ATF | 185 | 117 | 13528 | 1.00000 | 0.99498 | 97.90239 |
| GOTERM_MF_FAT | GO:0015399~primary active transmembrane      | 4 | 1.60643 | 2.47484 | 2.17E-01 | ATP9A, ATP6V1B1, ATF | 172 | 122 | 12983 | 1.00000 | 0.99662 | 96.69568 |
| GOTERM_MF_FAT | GO:0015405~P-P-bond-hydrolysis-driven trar   | 4 | 1.60643 | 2.47484 | 2.17E-01 | ATP9A, ATP6V1B1, ATF | 172 | 122 | 12983 | 1.00000 | 0.99662 | 96.69568 |
| GOTERM_CC_FAT | GO:0005773~vacuole                           | 6 | 2.40964 | 1.81151 | 2.34E-01 | SPACA3, PLA2G4B, ATI | 168 | 252 | 12782 | 1.00000 | 0.79776 | 96.49053 |
| GOTERM_BP_FAT | GO:0009260~ribonucleotide biosynthetic proc  | 4 | 1.60643 | 2.35885 | 2.38E-01 | ATP9A, ATP6V1B1, ATF | 185 | 124 | 13528 | 1.00000 | 0.99625 | 98.75493 |
| GOTERM_BP_FAT | GO:0006163~purine nucleotide metabolic pro   | 5 | 2.00803 | 1.96571 | 2.47E-01 | ATP9A, ATP6V1B1, ATF | 185 | 186 | 13528 | 1.00000 | 0.99569 | 98.97084 |
| GOTERM_BP_FAT | GO:0009165~nucleotide biosynthetic process   | 5 | 2.00803 | 1.96571 | 2.47E-01 | ATP9A, ATP6V1B1, ATF | 185 | 186 | 13528 | 1.00000 | 0.99569 | 98.97084 |
| GOTERM_MF_FAT | GO:0042625~ATPase activity, coupled to trar  | 3 | 1.20482 | 3.06010 | 2.55E-01 | ATP9A, ATP6V1B1, ATF | 172 | 74  | 12983 | 1.00000 | 0.99779 | 98.33417 |
| GOTERM_BP_FAT | GO:0034404~nucleobase, nucleoside and nu     | 5 | 2.00803 | 1.89441 | 2.68E-01 | ATP9A, ATP6V1B1, ATF | 185 | 193 | 13528 | 1.00000 | 0.99638 | 99.34870 |
| GOTERM_BP_FAT | GO:0034654~nucleobase, nucleoside, nucleo    | 5 | 2.00803 | 1.89441 | 2.68E-01 | ATP9A, ATP6V1B1, ATF | 185 | 193 | 13528 | 1.00000 | 0.99638 | 99.34870 |
| GOTERM_BP_FAT | GO:0044271~nitrogen compound biosynthetic    | 7 | 2.81124 | 1.57499 | 2.78E-01 | ATP9A, ALDH4A1, SUL  | 185 | 325 | 13528 | 1.00000 | 0.99632 | 99.47573 |
| GOTERM_BP_FAT | GO:0009150~purine ribonucleotide metabolic   | 4 | 1.60643 | 2.11955 | 2.90E-01 | ATP9A, ATP6V1B1, ATF | 185 | 138 | 13528 | 1.00000 | 0.99643 | 99.59599 |
| GOTERM_BP_FAT | GO:0009259~ribonucleotide metabolic proces   | 4 | 1.60643 | 1.98978 | 3.23E-01 | ATP9A, ATP6V1B1, ATF | 185 | 147 | 13528 | 1.00000 | 0.99644 | 99.81447 |
| GOTERM_BP_FAT | GO:0006754~ATP biosynthetic process          | 3 | 1.20482 | 2.46486 | 3.42E-01 | ATP9A, ATP6V1B1, ATF | 185 | 89  | 13528 | 1.00000 | 0.99640 | 99.88214 |
| GOTERM_BP_FAT | GO:0009206~purine ribonucleoside triphosph   | 3 | 1.20482 | 2.23850 | 3.86E-01 | ATP9A, ATP6V1B1, ATF | 185 | 98  | 13528 | 1.00000 | 0.99704 | 99.96145 |
| GOTERM_BP_FAT | GO:0009145~purine nucleoside triphosphate    | 3 | 1.20482 | 2.21589 | 3.91E-01 | ATP9A, ATP6V1B1, ATF | 185 | 99  | 13528 | 1.00000 | 0.99697 | 99.96605 |
| GOTERM_BP_FAT | GO:0009201~ribonucleoside triphosphate bio   | 3 | 1.20482 | 2.21589 | 3.91E-01 | ATP9A, ATP6V1B1, ATF | 185 | 99  | 13528 | 1.00000 | 0.99697 | 99.96605 |
| GOTERM_BP_FAT | GO:0009142~nucleoside triphosphate biosynt   | 3 | 1.20482 | 2.15072 | 4.05E-01 | ATP9A, ATP6V1B1, ATF | 185 | 102 | 13528 | 1.00000 | 0.99757 | 99.97689 |
| GOTERM_BP_FAT | GO:0046034~ATP metabolic process             | 3 | 1.20482 | 2.08927 | 4.19E-01 | ATP9A, ATP6V1B1, ATF | 185 | 105 | 13528 | 1.00000 | 0.99708 | 99.98435 |
| GOTERM_MF_FAT | GO:0016887~ATPase activity                   | 6 | 2.40964 | 1.35597 | 4.50E-01 | VCP, ATP9A, CETN2, A | 172 | 334 | 12983 | 1.00000 | 0.99922 | 99.97580 |
| GOTERM_BP_FAT | GO:0009205~purine ribonucleoside triphosph   | 3 | 1.20482 | 1.87498 | 4.74E-01 | ATP9A, ATP6V1B1, ATF | 185 | 117 | 13528 | 1.00000 | 0.99811 | 99.99685 |
| GOTERM_BP_FAT | GO:0009199~ribonucleoside triphosphate me    | 3 | 1.20482 | 1.85909 | 4.79E-01 | ATP9A, ATP6V1B1, ATF | 185 | 118 | 13528 | 1.00000 | 0.99786 | 99.99725 |
| GOTERM_MF_FAT | GO:0042623~ATPase activity, coupled          | 5 | 2.00803 | 1.38755 | 4.83E-01 | ATP9A, CETN2, ATP6V  | 172 | 272 | 12983 | 1.00000 | 0.99928 | 99.98979 |
| GOTERM_BP_FAT | GO:0009144~purine nucleoside triphosphate    | 3 | 1.20482 | 1.79814 | 4.96E-01 | ATP9A, ATP6V1B1, ATF | 185 | 122 | 13528 | 1.00000 | 0.99801 | 99.99842 |
| GOTERM_BP_FAT | GO:0009141~nucleoside triphosphate metabo    | 3 | 1.20482 | 1.67460 | 5.34E-01 | ATP9A, ATP6V1B1, ATF | 185 | 131 | 13528 | 1.00000 | 0.99880 | 99.99955 |

## Annotation Cluster 40 Enrichment Score: 0.5151783203813677

| Category      | Term                                       | Count | %       | Fold Enrich | PValue   | Genes               | List Total | Pop Hits | Pop Total | Bonferroni | Benjamini | FDR      |
|---------------|--------------------------------------------|-------|---------|-------------|----------|---------------------|------------|----------|-----------|------------|-----------|----------|
| GOTERM_BP_FAT | GO:0030036~actin cytoskeleton organization | 6     | 2.40964 | 1.94135     | 1.95E-01 | FGD2, TNNT2, SHROO  | 185        | 226      | 13528     | 1.00000    | 0.99596   | 96.95668 |
| GOTERM_BP_FAT | GO:0030029~actin filament-based process    | 6     | 2.40964 | 1.82052     | 2.32E-01 | FGD2, TNNT2, SHROO  | 185        | 241      | 13528     | 1.00000    | 0.99632   | 98.56871 |
| GOTERM_BP_FAT | GO:0007010~cytoskeleton organization       | 9     | 3.61446 | 1.50945     | 2.43E-01 | FGD2, TNNT2, SHROO  | 185        | 436      | 13528     | 1.00000    | 0.99600   | 98.87431 |
| GOTERM_BP_FAT | GO:0032989~cellular component morphogen    | 5     | 2.00803 | 0.92096     | 7.93E-01 | TNNT2, SHROOM1, API | 185        | 397      | 13528     | 1.00000    | 0.99995   | #####    |

## Annotation Cluster 41 Enrichment Score: 0.5043738741571876

| Category      | Term                                   | Count | %       | Fold Enrich | PValue   | Genes               | List Total | Pop Hits | Pop Total | Bonferroni | Benjamini | FDR      |
|---------------|----------------------------------------|-------|---------|-------------|----------|---------------------|------------|----------|-----------|------------|-----------|----------|
| GOTERM_BP_FAT | GO:0001503~ossification                | 4     | 1.60643 | 2.54345     | 2.06E-01 | SOST, THRA, ATP6V1B | 185        | 115      | 13528     | 1.00000    | 0.99549   | 97.57807 |
| GOTERM_BP_FAT | GO:0060348~bone development            | 4     | 1.60643 | 2.37803     | 2.35E-01 | SOST, THRA, ATP6V1B | 185        | 123      | 13528     | 1.00000    | 0.99625   | 98.65629 |
| GOTERM_BP_FAT | GO:0001501~skeletal system development | 5     | 2.00803 | 1.14615     | 6.34E-01 | SOST, THRA, COL12A1 | 185        | 319      | 13528     | 1.00000    | 0.99950   | 99.99999 |

## Annotation Cluster 42 Enrichment Score: 0.5024081725428344

| Category      | Term                                      | Count | %       | Fold Enrich | PValue   | Genes                | List Total | Pop Hits | Pop Total | Bonferroni | Benjamini | FDR      |
|---------------|-------------------------------------------|-------|---------|-------------|----------|----------------------|------------|----------|-----------|------------|-----------|----------|
| GOTERM_BP_FAT | GO:0009408~response to heat               | 3     | 1.20482 | 3.91737     | 1.77E-01 | TRPV1, P2RX3, HSPB3  | 185        | 56       | 13528     | 1.00000    | 0.99661   | 95.64562 |
| GOTERM_BP_FAT | GO:0009266~response to temperature stimul | 3     | 1.20482 | 2.64305     | 3.12E-01 | TRPV1, P2RX3, HSPB3  | 185        | 83       | 13528     | 1.00000    | 0.99634   | 99.75862 |
| GOTERM_BP_FAT | GO:0009628~response to abiotic stimulus   | 6     | 2.40964 | 1.19224     | 5.64E-01 | GNAT1, APP, TRPV1, P | 185        | 368      | 13528     | 1.00000    | 0.99908   | 99.99985 |

## Annotation Cluster 43 Enrichment Score: 0.4871029828279582

| Category      | Term                                          | Count | %       | Fold Enrich | PValue   | Genes                 | List Total | Pop Hits | Pop Total | Bonferroni | Benjamini | FDR      |
|---------------|-----------------------------------------------|-------|---------|-------------|----------|-----------------------|------------|----------|-----------|------------|-----------|----------|
| GOTERM_BP_FAT | GO:0051090~regulation of transcription facto  | 4     | 1.60643 | 2.83978     | 1.65E-01 | SP100, THRA, RIPK1, T | 185        | 103      | 13528     | 1.00000    | 0.99761   | 94.54783 |
| GOTERM_BP_FAT | GO:0051091~positive regulation of transcripti | 3     | 1.20482 | 3.65622     | 1.96E-01 | SP100, RIPK1, TSSK4   | 185        | 60       | 13528     | 1.00000    | 0.99567   | 97.04989 |
| GOTERM_BP_FAT | GO:0051101~regulation of DNA binding          | 4     | 1.60643 | 2.41733     | 2.27E-01 | SP100, THRA, RIPK1, T | 185        | 121      | 13528     | 1.00000    | 0.99627   | 98.43762 |
| GOTERM_BP_FAT | GO:0043388~positive regulation of DNA bindi   | 3     | 1.20482 | 3.13390     | 2.46E-01 | SP100, RIPK1, TSSK4   | 185        | 70       | 13528     | 1.00000    | 0.99598   | 98.95367 |
| GOTERM_BP_FAT | GO:0051099~positive regulation of binding     | 3     | 1.20482 | 2.81247     | 2.87E-01 | SP100, RIPK1, TSSK4   | 185        | 78       | 13528     | 1.00000    | 0.99648   | 99.56941 |
| GOTERM_BP_FAT | GO:0051098~regulation of binding              | 4     | 1.60643 | 1.91175     | 3.42E-01 | SP100, THRA, RIPK1, T | 185        | 153      | 13528     | 1.00000    | 0.99620   | 99.88331 |



|                 |                                             |   |         |         |          |                       |     |     |       |         |         |       |
|-----------------|---------------------------------------------|---|---------|---------|----------|-----------------------|-----|-----|-------|---------|---------|-------|
| GOTERM_BP_FAT   | GO:0044093~positive regulation of molecular | 7 | 2.81124 | 0.87350 | 8.14E-01 | TNNT2, MYL4, SP100, \ | 185 | 586 | 13528 | 1.00000 | 0.99997 | ##### |
| SP_PIR_KEYWORDS | ubl conjugation                             | 6 | 2.40964 | 0.79787 | 8.73E-01 | SP100, THRA, RIPK1, K | 246 | 588 | 19235 | 1.00000 | 0.99891 | ##### |

## Annotation Cluster 44 Enrichment Score: 0.4746520824760008

| Category        | Term                                           | Count | %       | Fold Enrich | PValue   | Genes               | List Total | Pop Hits | Pop Total | Bonferroni | Benjamini | FDR      |
|-----------------|------------------------------------------------|-------|---------|-------------|----------|---------------------|------------|----------|-----------|------------|-----------|----------|
| SP_PIR_KEYWORDS | ionic channel                                  | 8     | 3.21285 | 1.96707     | 1.13E-01 | KCNMB3, TTYH3, TRPV | 246        | 318      | 19235     | 1.00000    | 0.71319   | 80.49342 |
| SP_PIR_KEYWORDS | calcium channel                                | 3     | 1.20482 | 3.84546     | 1.82E-01 | TRPV1, TRPV5, CACNA | 246        | 61       | 19235     | 1.00000    | 0.81523   | 93.57851 |
| GOTERM_MF_FAT   | GO:0005262~calcium channel activity            | 3     | 1.20482 | 2.86643     | 2.79E-01 | TRPV1, TRPV5, CACNA | 172        | 79       | 12983     | 1.00000    | 0.99720   | 98.95317 |
| SP_PIR_KEYWORDS | calcium transport                              | 3     | 1.20482 | 2.75968     | 2.95E-01 | TRPV1, TRPV5, CACNA | 246        | 85       | 19235     | 1.00000    | 0.87408   | 99.14849 |
| GOTERM_MF_FAT   | GO:0005261~cation channel activity             | 6     | 2.40964 | 1.64689     | 2.96E-01 | KCNMB3, TRPV1, P2RX | 172        | 275      | 12983     | 1.00000    | 0.99693   | 99.25231 |
| GOTERM_MF_FAT   | GO:0046873~metal ion transmembrane trans       | 6     | 2.40964 | 1.38078     | 4.35E-01 | KCNMB3, TRPV1, P2RX | 172        | 328      | 12983     | 1.00000    | 0.99912   | 99.96435 |
| GOTERM_BP_FAT   | GO:0006816~calcium ion transport               | 3     | 1.20482 | 1.54488     | 5.78E-01 | TRPV1, TRPV5, CACNA | 185        | 142      | 13528     | 1.00000    | 0.99914   | 99.99991 |
| GOTERM_BP_FAT   | GO:0030001~metal ion transport                 | 7     | 2.81124 | 1.10080     | 6.10E-01 | KCNMB3, TRPV1, SLC3 | 185        | 465      | 13528     | 1.00000    | 0.99929   | 99.99997 |
| GOTERM_BP_FAT   | GO:0015674~di-, tri-valent inorganic cation tr | 3     | 1.20482 | 1.24644     | 6.94E-01 | TRPV1, TRPV5, CACNA | 185        | 176      | 13528     | 1.00000    | 0.99981   | #####    |

## Annotation Cluster 45 Enrichment Score: 0.47267458116333533

| Category      | Term                                            | Count | %       | Fold Enrich | PValue   | Genes                | List Total | Pop Hits | Pop Total | Bonferroni | Benjamini | FDR      |
|---------------|-------------------------------------------------|-------|---------|-------------|----------|----------------------|------------|----------|-----------|------------|-----------|----------|
| GOTERM_BP_FAT | GO:0006091~generation of precursor metabo       | 8     | 3.21285 | 1.86899     | 1.33E-01 | MCHR1, GCK, LDHAL6f  | 185        | 313      | 13528     | 1.00000    | 0.99789   | 89.88712 |
| GOTERM_BP_FAT | GO:0042592~homeostatic process                  | 15    | 6.02410 | 1.46054     | 1.44E-01 | KCNMB3, MCHR1, TRP   | 185        | 751      | 13528     | 1.00000    | 0.99811   | 91.83186 |
| GOTERM_BP_FAT | GO:0048878~chemical homeostasis                 | 11    | 4.41767 | 1.57103     | 1.60E-01 | KCNMB3, MCHR1, ASG   | 185        | 512      | 13528     | 1.00000    | 0.99757   | 94.03106 |
| GOTERM_BP_FAT | GO:0055080~cation homeostasis                   | 7     | 2.81124 | 1.78976     | 1.94E-01 | MCHR1, APP, CCR6, P` | 185        | 286      | 13528     | 1.00000    | 0.99634   | 96.91251 |
| GOTERM_BP_FAT | GO:0050801~ion homeostasis                      | 8     | 3.21285 | 1.43030     | 3.22E-01 | KCNMB3, MCHR1, APP   | 185        | 409      | 13528     | 1.00000    | 0.99662   | 99.81070 |
| GOTERM_BP_FAT | GO:0030005~cellular di-, tri-valent inorganic c | 5     | 2.00803 | 1.61067     | 3.73E-01 | MCHR1, APP, CCR6, P` | 185        | 227      | 13528     | 1.00000    | 0.99719   | 99.94619 |
| GOTERM_BP_FAT | GO:0055066~di-, tri-valent inorganic cation ho  | 5     | 2.00803 | 1.52980     | 4.10E-01 | MCHR1, APP, CCR6, P` | 185        | 239      | 13528     | 1.00000    | 0.99763   | 99.97951 |
| GOTERM_BP_FAT | GO:0055082~cellular chemical homeostasis        | 7     | 2.81124 | 1.34703     | 4.14E-01 | KCNMB3, MCHR1, APP   | 185        | 380      | 13528     | 1.00000    | 0.99742   | 99.98191 |
| GOTERM_BP_FAT | GO:0019725~cellular homeostasis                 | 8     | 3.21285 | 1.25535     | 4.49E-01 | KCNMB3, MCHR1, APP   | 185        | 466      | 13528     | 1.00000    | 0.99803   | 99.99329 |
| GOTERM_BP_FAT | GO:0006874~cellular calcium ion homeostasi      | 4     | 1.60643 | 1.59835     | 4.50E-01 | MCHR1, APP, CCR6, P` | 185        | 183      | 13528     | 1.00000    | 0.99796   | 99.99352 |
| GOTERM_BP_FAT | GO:0030003~cellular cation homeostasis          | 5     | 2.00803 | 1.43946     | 4.56E-01 | MCHR1, APP, CCR6, P` | 185        | 254      | 13528     | 1.00000    | 0.99785   | 99.99455 |
| GOTERM_BP_FAT | GO:0055074~calcium ion homeostasis              | 4     | 1.60643 | 1.55584     | 4.74E-01 | MCHR1, APP, CCR6, P` | 185        | 188      | 13528     | 1.00000    | 0.99820   | 99.99682 |
| GOTERM_BP_FAT | GO:0006875~cellular metal ion homeostasis       | 4     | 1.60643 | 1.49233     | 5.00E-01 | MCHR1, APP, CCR6, P` | 185        | 196      | 13528     | 1.00000    | 0.99804   | 99.99858 |
| GOTERM_BP_FAT | GO:0055065~metal ion homeostasis                | 4     | 1.60643 | 1.42682     | 5.30E-01 | MCHR1, APP, CCR6, P` | 185        | 205      | 13528     | 1.00000    | 0.99876   | 99.99948 |
| GOTERM_BP_FAT | GO:0006873~cellular ion homeostasis             | 6     | 2.40964 | 1.17312     | 5.79E-01 | KCNMB3, MCHR1, APP   | 185        | 374      | 13528     | 1.00000    | 0.99906   | 99.99991 |

## Annotation Cluster 46 Enrichment Score: 0.4691801618635848

| Category        | Term                                        | Count | %       | Fold Enrich | PValue   | Genes               | List Total | Pop Hits | Pop Total | Bonferroni | Benjamini | FDR      |
|-----------------|---------------------------------------------|-------|---------|-------------|----------|---------------------|------------|----------|-----------|------------|-----------|----------|
| SP_PIR_KEYWORDS | vision                                      | 4     | 1.60643 | 2.25010     | 2.61E-01 | GNAT1, SLC45A2, CAC | 246        | 139      | 19235     | 1.00000    | 0.85419   | 98.38080 |
| GOTERM_BP_FAT   | GO:0007600~sensory perception               | 14    | 5.62249 | 1.26388     | 3.09E-01 | GNAT1, SLC45A2, OR2 | 185        | 810      | 13528     | 1.00000    | 0.99662   | 99.74091 |
| GOTERM_BP_FAT   | GO:0050953~sensory perception of light stim | 5     | 2.00803 | 1.69269     | 3.39E-01 | CRYBB1, GNAT1, SLC4 | 185        | 216      | 13528     | 1.00000    | 0.99662   | 99.87215 |
| GOTERM_BP_FAT   | GO:0007601~visual perception                | 5     | 2.00803 | 1.69269     | 3.39E-01 | CRYBB1, GNAT1, SLC4 | 185        | 216      | 13528     | 1.00000    | 0.99662   | 99.87215 |
| SP_PIR_KEYWORDS | sensory transduction                        | 9     | 3.61446 | 1.18272     | 4.88E-01 | GNAT1, SLC45A2, OR2 | 246        | 595      | 19235     | 1.00000    | 0.95549   | 99.98919 |

## Annotation Cluster 47 Enrichment Score: 0.4492954830695583

| Category      | Term                                          | Count | %       | Fold Enrich | PValue   | Genes                | List Total | Pop Hits | Pop Total | Bonferroni | Benjamini | FDR      |
|---------------|-----------------------------------------------|-------|---------|-------------|----------|----------------------|------------|----------|-----------|------------|-----------|----------|
| GOTERM_BP_FAT | GO:0055002~striated muscle cell developme     | 3     | 1.20482 | 4.21871     | 1.57E-01 | TNNT2, APP, CAPN3    | 185        | 52       | 13528     | 1.00000    | 0.99770   | 93.67357 |
| GOTERM_BP_FAT | GO:0055001~muscle cell development            | 3     | 1.20482 | 3.91737     | 1.77E-01 | TNNT2, APP, CAPN3    | 185        | 56       | 13528     | 1.00000    | 0.99661   | 95.64562 |
| GOTERM_BP_FAT | GO:0051146~striated muscle cell differentiati | 3     | 1.20482 | 2.49287     | 3.37E-01 | TNNT2, APP, CAPN3    | 185        | 88       | 13528     | 1.00000    | 0.99673   | 99.86697 |
| GOTERM_BP_FAT | GO:0042692~muscle cell differentiation        | 3     | 1.20482 | 1.81300     | 4.92E-01 | TNNT2, APP, CAPN3    | 185        | 121      | 13528     | 1.00000    | 0.99805   | 99.99818 |
| GOTERM_BP_FAT | GO:0007517~muscle organ development           | 4     | 1.60643 | 1.38624     | 5.51E-01 | TNNT2, APP, MYL4, CA | 185        | 211      | 13528     | 1.00000    | 0.99898   | 99.99975 |
| GOTERM_BP_FAT | GO:0032989~cellular component morphogeni      | 5     | 2.00803 | 0.92096     | 7.93E-01 | TNNT2, SHROOM1, API  | 185        | 397      | 13528     | 1.00000    | 0.99995   | #####    |

## Annotation Cluster 48 Enrichment Score: 0.4485736356518668

| Category | Term                                       | Count | %       | Fold Enrich | PValue   | Genes              | List Total | Pop Hits | Pop Total | Bonferroni | Benjamini | FDR      |
|----------|--------------------------------------------|-------|---------|-------------|----------|--------------------|------------|----------|-----------|------------|-----------|----------|
| INTERPRO | IPR001965:Zinc finger, PHD-type            | 3     | 1.20482 | 2.46800     | 3.42E-01 | BRD1, TCF20, SP100 | 225        | 90       | 16659     | 1.00000    | 0.99443   | 99.75067 |
| INTERPRO | IPR019786:Zinc finger, PHD-type, conserved | 3     | 1.20482 | 2.38839     | 3.56E-01 | BRD1, TCF20, SP100 | 225        | 93       | 16659     | 1.00000    | 0.99517   | 99.81939 |
| SMART    | SM00249:PHD                                | 3     | 1.20482 | 2.31018     | 3.70E-01 | BRD1, TCF20, SP100 | 131        | 90       | 9079      | 1.00000    | 0.98858   | 99.48991 |

## Annotation Cluster 49 Enrichment Score: 0.4482117438212104

| Category                                                    | Term                                            | Count | %       | Fold Enrich PValue | Genes    | List Total             | Pop Hits | Pop Total | Bonferroni | Benjamini | FDR     |          |
|-------------------------------------------------------------|-------------------------------------------------|-------|---------|--------------------|----------|------------------------|----------|-----------|------------|-----------|---------|----------|
| INTERPRO                                                    | IPR001849:Pleckstrin homology                   | 7     | 2.81124 | 1.87105            | 1.71E-01 | FGD2, DAB2IP, KIF1A, J | 225      | 277       | 16659      | 1.00000   | 0.95584 | 93.14169 |
| SMART                                                       | SM00233:PH                                      | 7     | 2.81124 | 1.75140            | 2.06E-01 | FGD2, DAB2IP, KIF1A, J | 131      | 277       | 9079       | 1.00000   | 0.94878 | 92.79476 |
| UP_SEQ_FEATURE                                              | domain:DH                                       | 3     | 1.20482 | 3.47889            | 2.12E-01 | FGD2, ARHGEF7, PLEK    | 246      | 67        | 19113      | 1.00000   | 0.99635 | 97.49379 |
| INTERPRO                                                    | IPR000219:Dbl homology (DH) domain              | 3     | 1.20482 | 3.21913            | 2.37E-01 | FGD2, ARHGEF7, PLEK    | 225      | 69        | 16659      | 1.00000   | 0.97645 | 97.94698 |
| GOTERM_MF_FAT                                               | GO:0005089~Rho guanyl-nucleotide exchang        | 3     | 1.20482 | 3.06010            | 2.55E-01 | FGD2, ARHGEF7, PLEK    | 172      | 74        | 12983      | 1.00000   | 0.99779 | 98.33417 |
| GOTERM_BP_FAT                                               | GO:0051056~regulation of small GTPase me        | 6     | 2.40964 | 1.74106            | 2.59E-01 | FGD2, DAB2IP, ARHGE    | 185      | 252       | 13528      | 1.00000   | 0.99585 | 99.20559 |
| SMART                                                       | SM00325:RhoGEF                                  | 3     | 1.20482 | 3.01328            | 2.60E-01 | FGD2, ARHGEF7, PLEK    | 131      | 69        | 9079       | 1.00000   | 0.95807 | 96.76570 |
| GOTERM_BP_FAT                                               | GO:0051336~regulation of hydrolase activity     | 7     | 2.81124 | 1.51890            | 3.11E-01 | GNAT1, FGD2, TNNT2,    | 185      | 337       | 13528      | 1.00000   | 0.99649 | 99.75098 |
| GOTERM_BP_FAT                                               | GO:0046578~regulation of Ras protein signal     | 5     | 2.00803 | 1.74106            | 3.17E-01 | FGD2, ARHGEF7, ACAF    | 185      | 210       | 13528      | 1.00000   | 0.99643 | 99.78302 |
| GOTERM_MF_FAT                                               | GO:0005088~Ras guanyl-nucleotide exchang        | 3     | 1.20482 | 2.57327            | 3.23E-01 | FGD2, ARHGEF7, PLEK    | 172      | 88        | 12983      | 1.00000   | 0.99790 | 99.56289 |
| SP_PIR_KEYWORDS                                             | GTPase activation                               | 4     | 1.60643 | 1.96707            | 3.29E-01 | DAB2IP, ACAP1, PLEK    | 246      | 159       | 19235      | 1.00000   | 0.88709 | 99.57009 |
| UP_SEQ_FEATURE                                              | domain:PH                                       | 5     | 2.00803 | 1.63914            | 3.61E-01 | DAB2IP, KIF1A, ARHGE   | 246      | 237       | 19113      | 1.00000   | 0.99969 | 99.90174 |
| GOTERM_BP_FAT                                               | GO:0035023~regulation of Rho protein signal     | 3     | 1.20482 | 2.21589            | 3.91E-01 | FGD2, ARHGEF7, PLEK    | 185      | 99        | 13528      | 1.00000   | 0.99697 | 99.96605 |
| GOTERM_BP_FAT                                               | GO:0032318~regulation of Ras GTPase activ       | 3     | 1.20482 | 2.10936            | 4.15E-01 | FGD2, ACAP1, TBC1D2    | 185      | 104       | 13528      | 1.00000   | 0.99729 | 99.98217 |
| GOTERM_MF_FAT                                               | GO:0005083~small GTPase regulator activity      | 5     | 2.00803 | 1.37742            | 4.89E-01 | FGD2, ARHGEF7, ACAF    | 172      | 274       | 12983      | 1.00000   | 0.99907 | 99.99125 |
| GOTERM_BP_FAT                                               | GO:0043087~regulation of GTPase activity        | 3     | 1.20482 | 1.78352            | 5.01E-01 | FGD2, ACAP1, TBC1D2    | 185      | 123       | 13528      | 1.00000   | 0.99798 | 99.99862 |
| GOTERM_MF_FAT                                               | GO:0005096~GTPase activator activity            | 4     | 1.60643 | 1.37241            | 5.57E-01 | DAB2IP, ACAP1, PLEK    | 172      | 220       | 12983      | 1.00000   | 0.99933 | 99.99880 |
| GOTERM_MF_FAT                                               | GO:0005085~guanyl-nucleotide exchange fac       | 3     | 1.20482 | 1.48979            | 5.98E-01 | FGD2, ARHGEF7, PLEK    | 172      | 152       | 12983      | 1.00000   | 0.99945 | 99.99969 |
| GOTERM_MF_FAT                                               | GO:0030695~GTPase regulator activity            | 6     | 2.40964 | 1.12103            | 6.19E-01 | FGD2, DAB2IP, ARHGE    | 172      | 404       | 12983      | 1.00000   | 0.99934 | 99.99985 |
| GOTERM_MF_FAT                                               | GO:0060589~nucleoside-triphosphatase regu       | 6     | 2.40964 | 1.09660            | 6.38E-01 | FGD2, DAB2IP, ARHGE    | 172      | 413       | 12983      | 1.00000   | 0.99923 | 99.99993 |
| GOTERM_MF_FAT                                               | GO:0008047~enzyme activator activity            | 5     | 2.00803 | 1.12661            | 6.48E-01 | APP, DAB2IP, ACAP1, F  | 172      | 335       | 12983      | 1.00000   | 0.99927 | 99.99995 |
| Annotation Cluster 50 Enrichment Score: 0.40738304574015616 |                                                 |       |         |                    |          |                        |          |           |            |           |         |          |
| Category                                                    | Term                                            | Count | %       | Fold Enrich PValue | Genes    | List Total             | Pop Hits | Pop Total | Bonferroni | Benjamini | FDR     |          |
| SP_PIR_KEYWORDS                                             | Serine protease inhibitor                       | 3     | 1.20482 | 2.93216            | 2.71E-01 | APP, ITIH1, SERPINA1   | 246      | 80        | 19235      | 1.00000   | 0.85189 | 98.66580 |
| GOTERM_MF_FAT                                               | GO:0004857~enzyme inhibitor activity            | 6     | 2.40964 | 1.67739            | 2.84E-01 | HSPBP1, APP, PPP1R1    | 172      | 270       | 12983      | 1.00000   | 0.99675 | 99.03954 |
| GOTERM_MF_FAT                                               | GO:0004867~serine-type endopeptidase inhib      | 3     | 1.20482 | 2.46139            | 3.42E-01 | APP, ITIH1, SERPINA1   | 172      | 92        | 12983      | 1.00000   | 0.99828 | 99.70769 |
| SP_PIR_KEYWORDS                                             | protease inhibitor                              | 3     | 1.20482 | 2.19227            | 3.96E-01 | APP, ITIH1, SERPINA1   | 246      | 107       | 19235      | 1.00000   | 0.92516 | 99.89798 |
| GOTERM_MF_FAT                                               | GO:0004866~endopeptidase inhibitor activity     | 3     | 1.20482 | 1.56171            | 5.72E-01 | APP, ITIH1, SERPINA1   | 172      | 145       | 12983      | 1.00000   | 0.99942 | 99.99926 |
| GOTERM_MF_FAT                                               | GO:0030414~peptidase inhibitor activity         | 3     | 1.20482 | 1.48005            | 6.01E-01 | APP, ITIH1, SERPINA1   | 172      | 153       | 12983      | 1.00000   | 0.99940 | 99.99973 |
| Annotation Cluster 51 Enrichment Score: 0.40202590742904837 |                                                 |       |         |                    |          |                        |          |           |            |           |         |          |
| Category                                                    | Term                                            | Count | %       | Fold Enrich PValue | Genes    | List Total             | Pop Hits | Pop Total | Bonferroni | Benjamini | FDR     |          |
| GOTERM_CC_FAT                                               | GO:0005773~vacuole                              | 6     | 2.40964 | 1.81151            | 2.34E-01 | SPACA3, PLA2G4F, AT    | 168      | 252       | 12782      | 1.00000   | 0.79776 | 96.49053 |
| GOTERM_CC_FAT                                               | GO:0000323~lytic vacuole                        | 4     | 1.60643 | 1.44234            | 5.16E-01 | SPACA3, PLA2G4F, SL    | 168      | 211       | 12782      | 1.00000   | 0.93542 | 99.98905 |
| GOTERM_CC_FAT                                               | GO:0005764~lysosome                             | 4     | 1.60643 | 1.44234            | 5.16E-01 | SPACA3, PLA2G4F, SL    | 168      | 211       | 12782      | 1.00000   | 0.93542 | 99.98905 |
| Annotation Cluster 52 Enrichment Score: 0.394606308834446   |                                                 |       |         |                    |          |                        |          |           |            |           |         |          |
| Category                                                    | Term                                            | Count | %       | Fold Enrich PValue | Genes    | List Total             | Pop Hits | Pop Total | Bonferroni | Benjamini | FDR     |          |
| SP_PIR_KEYWORDS                                             | heme                                            | 4     | 1.60643 | 2.58483            | 2.00E-01 | CYP2A13, CYB561, MB    | 246      | 121       | 19235      | 1.00000   | 0.82601 | 95.27047 |
| SP_PIR_KEYWORDS                                             | iron                                            | 6     | 2.40964 | 1.64613            | 2.98E-01 | CYP2A13, APP, ALOX1    | 246      | 285       | 19235      | 1.00000   | 0.86889 | 99.20465 |
| UP_SEQ_FEATURE                                              | metal ion-binding site:Iron (heme axial ligand) | 3     | 1.20482 | 2.37842            | 3.58E-01 | CYP2A13, CYB561, CY    | 246      | 98        | 19113      | 1.00000   | 0.99972 | 99.89557 |
| GOTERM_MF_FAT                                               | GO:0005506~iron ion binding                     | 6     | 2.40964 | 1.47044            | 3.82E-01 | CYP2A13, APP, ALOX1    | 172      | 308       | 12983      | 1.00000   | 0.99859 | 99.87807 |
| GOTERM_MF_FAT                                               | GO:0020037~heme binding                         | 3     | 1.20482 | 1.87147            | 4.75E-01 | CYP2A13, MB, CYP4B1    | 172      | 121       | 12983      | 1.00000   | 0.99931 | 99.98736 |
| GOTERM_MF_FAT                                               | GO:0046906~tetrapyrrole binding                 | 3     | 1.20482 | 1.75541            | 5.09E-01 | CYP2A13, MB, CYP4B1    | 172      | 129       | 12983      | 1.00000   | 0.99926 | 99.99500 |
| GOTERM_BP_FAT                                               | GO:0055114~oxidation reduction                  | 7     | 2.81124 | 0.80105            | 8.72E-01 | CYP2A13, LDHAL6B, AL   | 185      | 639       | 13528      | 1.00000   | 0.99999 | #####    |
| Annotation Cluster 53 Enrichment Score: 0.3797669152173389  |                                                 |       |         |                    |          |                        |          |           |            |           |         |          |
| Category                                                    | Term                                            | Count | %       | Fold Enrich PValue | Genes    | List Total             | Pop Hits | Pop Total | Bonferroni | Benjamini | FDR     |          |
| UP_SEQ_FEATURE                                              | domain:SH2                                      | 3     | 1.20482 | 2.42797            | 3.49E-01 | TNS4, FGR, GRAPL       | 246      | 96        | 19113      | 1.00000   | 0.99969 | 99.86960 |
| SP_PIR_KEYWORDS                                             | SH2 domain                                      | 3     | 1.20482 | 2.11327            | 4.14E-01 | TNS4, FGR, GRAPL       | 246      | 111       | 19235      | 1.00000   | 0.93051 | 99.93219 |
| INTERPRO                                                    | IPR000980:SH2 motif                             | 3     | 1.20482 | 2.00108            | 4.41E-01 | TNS4, FGR, GRAPL       | 225      | 111       | 16659      | 1.00000   | 0.99809 | 99.97625 |
| SMART                                                       | SM00252:SH2                                     | 3     | 1.20482 | 1.87312            | 4.74E-01 | TNS4, FGR, GRAPL       | 131      | 111       | 9079       | 1.00000   | 0.99677 | 99.93466 |
| Annotation Cluster 54 Enrichment Score: 0.37820747201209426 |                                                 |       |         |                    |          |                        |          |           |            |           |         |          |
| Category                                                    | Term                                            | Count | %       | Fold Enrich PValue | Genes    | List Total             | Pop Hits | Pop Total | Bonferroni | Benjamini | FDR     |          |

|               |                                            |   |         |         |          |                  |     |     |       |         |         |          |
|---------------|--------------------------------------------|---|---------|---------|----------|------------------|-----|-----|-------|---------|---------|----------|
| GOTERM_BP_FAT | GO:0051605~protein maturation by peptide b | 3 | 1.20482 | 2.55085 | 3.27E-01 | FCN2, CUZD1, C1S | 185 | 86  | 13528 | 1.00000 | 0.99624 | 99.83084 |
| GOTERM_BP_FAT | GO:0016485~protein processing              | 3 | 1.20482 | 1.95869 | 4.52E-01 | FCN2, CUZD1, C1S | 185 | 112 | 13528 | 1.00000 | 0.99791 | 99.99381 |
| GOTERM_BP_FAT | GO:0051604~protein maturation              | 3 | 1.20482 | 1.79814 | 4.96E-01 | FCN2, CUZD1, C1S | 185 | 122 | 13528 | 1.00000 | 0.99801 | 99.99842 |

## Annotation Cluster 55 Enrichment Score: 0.37301980450997557

| Category      | Term                              | Count | %       | Fold Enrich | PValue   | Genes             | List Total | Pop Hits | Pop Total | Bonferroni | Benjamini | FDR      |
|---------------|-----------------------------------|-------|---------|-------------|----------|-------------------|------------|----------|-----------|------------|-----------|----------|
| GOTERM_CC_FAT | GO:0030017~sarcomere              | 3     | 1.20482 | 2.32908     | 3.67E-01 | TNNT2, MYL4, ANK1 | 168        | 98       | 12782     | 1.00000    | 0.88596   | 99.68327 |
| GOTERM_CC_FAT | GO:0030016~myofibril              | 3     | 1.20482 | 2.05631     | 4.27E-01 | TNNT2, MYL4, ANK1 | 168        | 111      | 12782     | 1.00000    | 0.90624   | 99.90912 |
| GOTERM_CC_FAT | GO:0044449~contractile fiber part | 3     | 1.20482 | 2.01991     | 4.36E-01 | TNNT2, MYL4, ANK1 | 168        | 113      | 12782     | 1.00000    | 0.90334   | 99.92544 |
| GOTERM_CC_FAT | GO:0043292~contractile fiber      | 3     | 1.20482 | 1.88636     | 4.71E-01 | TNNT2, MYL4, ANK1 | 168        | 121      | 12782     | 1.00000    | 0.91379   | 99.96669 |

## Annotation Cluster 56 Enrichment Score: 0.3558487168090873

| Category        | Term                          | Count | %       | Fold Enrich | PValue   | Genes                   | List Total | Pop Hits | Pop Total | Bonferroni | Benjamini | FDR      |
|-----------------|-------------------------------|-------|---------|-------------|----------|-------------------------|------------|----------|-----------|------------|-----------|----------|
| GOTERM_CC_FAT   | GO:0005792~microsome          | 6     | 2.40964 | 1.92616     | 1.99E-01 | CYP2A13, VCP, AQP8, ... | 168        | 237      | 12782     | 1.00000    | 0.77845   | 93.83891 |
| GOTERM_CC_FAT   | GO:0042598~vesicular fraction | 6     | 2.40964 | 1.87090     | 2.15E-01 | CYP2A13, VCP, AQP8, ... | 168        | 244      | 12782     | 1.00000    | 0.77574   | 95.22095 |
| SP_PIR_KEYWORDS | microsome                     | 3     | 1.20482 | 2.21295     | 3.92E-01 | CYP2A13, TAPBPL, CYI    | 246        | 106      | 19235     | 1.00000    | 0.92520   | 99.88712 |
| GOTERM_CC_FAT   | GO:0005624~membrane fraction  | 10    | 4.01606 | 0.94046     | 7.38E-01 | CYP2A13, APP, VCP, F    | 168        | 809      | 12782     | 1.00000    | 0.98775   | #####    |
| GOTERM_CC_FAT   | GO:0000267~cell fraction      | 13    | 5.22088 | 0.91328     | 7.65E-01 | AQP8, GNRH2, COMT, ...  | 168        | 1083     | 12782     | 1.00000    | 0.99017   | #####    |
| GOTERM_CC_FAT   | GO:0005626~insoluble fraction | 10    | 4.01606 | 0.90683     | 7.75E-01 | CYP2A13, APP, VCP, F    | 168        | 839      | 12782     | 1.00000    | 0.99078   | #####    |

## Annotation Cluster 57 Enrichment Score: 0.32247011545797327

| Category      | Term                                       | Count | %       | Fold Enrich | PValue   | Genes                 | List Total | Pop Hits | Pop Total | Bonferroni | Benjamini | FDR      |
|---------------|--------------------------------------------|-------|---------|-------------|----------|-----------------------|------------|----------|-----------|------------|-----------|----------|
| GOTERM_BP_FAT | GO:0007254~JNK cascade                     | 3     | 1.20482 | 3.71819     | 1.91E-01 | RIPK1, DUSP10, MAPK   | 185        | 59       | 13528     | 1.00000    | 0.99692   | 96.74365 |
| GOTERM_BP_FAT | GO:0031098~stress-activated protein kinase | 3     | 1.20482 | 3.48211     | 2.11E-01 | RIPK1, DUSP10, MAPK   | 185        | 63       | 13528     | 1.00000    | 0.99521   | 97.81845 |
| GOTERM_BP_FAT | GO:0000165~MAPKKK cascade                  | 3     | 1.20482 | 1.19224     | 7.17E-01 | RIPK1, DUSP10, MAPK   | 185        | 184      | 13528     | 1.00000    | 0.99985   | #####    |
| GOTERM_BP_FAT | GO:0007243~protein kinase cascade          | 4     | 1.60643 | 0.79053     | 8.83E-01 | SGK2, RIPK1, DUSP10,  | 185        | 370      | 13528     | 1.00000    | 1.00000   | #####    |
| GOTERM_BP_FAT | GO:0033554~cellular response to stress     | 5     | 2.00803 | 0.64597     | 9.53E-01 | SP100, VCP, RIPK1, DL | 185        | 566      | 13528     | 1.00000    | 1.00000   | #####    |

## Annotation Cluster 58 Enrichment Score: 0.3198952403170382

| Category       | Term                   | Count | %       | Fold Enrich | PValue   | Genes                | List Total | Pop Hits | Pop Total | Bonferroni | Benjamini | FDR      |
|----------------|------------------------|-------|---------|-------------|----------|----------------------|------------|----------|-----------|------------|-----------|----------|
| INTERPRO       | IPR000210:BTB/POZ-like | 4     | 1.60643 | 1.65453     | 4.31E-01 | KLHL38, KCTD1, RHOB  | 225        | 179      | 16659     | 1.00000    | 0.99824   | 99.96888 |
| INTERPRO       | IPR011333:BTB/POZ fold | 4     | 1.60643 | 1.63624     | 4.41E-01 | KLHL38, KCTD1, RHOB  | 225        | 181      | 16659     | 1.00000    | 0.99833   | 99.97596 |
| SMART          | SM00225:BTB            | 4     | 1.60643 | 1.54872     | 4.75E-01 | KLHL38, KCTD1, RHOB  | 131        | 179      | 9079      | 1.00000    | 0.99517   | 99.93538 |
| INTERPRO       | IPR013069:BTB/POZ      | 3     | 1.20482 | 1.74898     | 5.11E-01 | KLHL38, RHOBTB2, BTI | 225        | 127      | 16659     | 1.00000    | 0.99947   | 99.99653 |
| UP_SEQ_FEATURE | domain:BTB             | 3     | 1.20482 | 1.64145     | 5.46E-01 | KLHL38, KCTD1, BTBD  | 246        | 142      | 19113     | 1.00000    | 1.00000   | 99.99950 |

## Annotation Cluster 59 Enrichment Score: 0.30175832227998134

| Category        | Term                                     | Count | %       | Fold Enrich | PValue   | Genes                | List Total | Pop Hits | Pop Total | Bonferroni | Benjamini | FDR      |
|-----------------|------------------------------------------|-------|---------|-------------|----------|----------------------|------------|----------|-----------|------------|-----------|----------|
| SP_PIR_KEYWORDS | cell division                            | 6     | 2.40964 | 1.77707     | 2.51E-01 | SEPT4, CETN2, NEDD9  | 246        | 264      | 19235     | 1.00000    | 0.85195   | 98.05340 |
| GOTERM_CC_FAT   | GO:0005819~spindle                       | 4     | 1.60643 | 2.07029     | 3.01E-01 | APP, PLEKHG6, NEDD9  | 168        | 147      | 12782     | 1.00000    | 0.83936   | 98.89858 |
| SP_PIR_KEYWORDS | cell cycle                               | 8     | 3.21285 | 1.35689     | 3.63E-01 | SEPT4, CROCC, CDK2/  | 246        | 461      | 19235     | 1.00000    | 0.91125   | 99.78597 |
| GOTERM_BP_FAT   | GO:0051301~cell division                 | 6     | 2.40964 | 1.48727     | 3.75E-01 | SEPT4, CETN2, NEDD9  | 185        | 295      | 13528     | 1.00000    | 0.99713   | 99.94884 |
| GOTERM_BP_FAT   | GO:0007049~cell cycle                    | 12    | 4.81928 | 1.13079     | 4.88E-01 | SEPT4, APP, CROCC, I | 185        | 776      | 13528     | 1.00000    | 0.99802   | 99.99797 |
| GOTERM_BP_FAT   | GO:0022403~cell cycle phase              | 7     | 2.81124 | 1.23640     | 4.96E-01 | APP, CDK2AP1, CETN2  | 185        | 414      | 13528     | 1.00000    | 0.99809   | 99.99839 |
| GOTERM_BP_FAT   | GO:0000278~mitotic cell cycle            | 6     | 2.40964 | 1.18580     | 5.69E-01 | APP, CDK2AP1, CETN2  | 185        | 370      | 13528     | 1.00000    | 0.99907   | 99.99987 |
| GOTERM_BP_FAT   | GO:0000280~nuclear division              | 4     | 1.60643 | 1.32953     | 5.78E-01 | CETN2, NEDD9, NEK6,  | 185        | 220      | 13528     | 1.00000    | 0.99910   | 99.99991 |
| GOTERM_BP_FAT   | GO:0007067~mitosis                       | 4     | 1.60643 | 1.32953     | 5.78E-01 | CETN2, NEDD9, NEK6,  | 185        | 220      | 13528     | 1.00000    | 0.99910   | 99.99991 |
| GOTERM_BP_FAT   | GO:0000087~M phase of mitotic cell cycle | 4     | 1.60643 | 1.30579     | 5.91E-01 | CETN2, NEDD9, NEK6,  | 185        | 224      | 13528     | 1.00000    | 0.99910   | 99.99994 |
| GOTERM_BP_FAT   | GO:0048285~organelle fission             | 4     | 1.60643 | 1.27728     | 6.06E-01 | CETN2, NEDD9, NEK6,  | 185        | 229      | 13528     | 1.00000    | 0.99930   | 99.99997 |
| GOTERM_BP_FAT   | GO:0000279~M phase                       | 5     | 2.00803 | 1.11131     | 6.58E-01 | CETN2, NEDD9, LFNG,  | 185        | 329      | 13528     | 1.00000    | 0.99961   | #####    |
| SP_PIR_KEYWORDS | mitosis                                  | 3     | 1.20482 | 1.28182     | 6.80E-01 | CETN2, NEDD9, NEK6   | 246        | 183      | 19235     | 1.00000    | 0.98889   | 99.99998 |
| GOTERM_BP_FAT   | GO:0022402~cell cycle process            | 7     | 2.81124 | 0.90597     | 7.86E-01 | APP, CDK2AP1, CETN2  | 185        | 565      | 13528     | 1.00000    | 0.99995   | #####    |

## Annotation Cluster 60 Enrichment Score: 0.256997565562394

| Category      | Term                              | Count | %       | Fold Enrich | PValue   | Genes                 | List Total | Pop Hits | Pop Total | Bonferroni | Benjamini | FDR      |
|---------------|-----------------------------------|-------|---------|-------------|----------|-----------------------|------------|----------|-----------|------------|-----------|----------|
| GOTERM_BP_FAT | GO:0016310~phosphorylation        | 15    | 6.02410 | 1.37108     | 2.01E-01 | SGK2, FGR, ATP6V1B1   | 185        | 800      | 13528     | 1.00000    | 0.99522   | 97.28533 |
| INTERPRO      | IPR001245:Tyrosine protein kinase | 4     | 1.60643 | 2.50983     | 2.12E-01 | FGR, RIPK1, NEK6, CSI | 225        | 118      | 16659     | 1.00000    | 0.96968   | 96.71786 |

|                 |                                               |    |          |         |          |                       |     |      |       |         |         |          |
|-----------------|-----------------------------------------------|----|----------|---------|----------|-----------------------|-----|------|-------|---------|---------|----------|
| SMART           | SM00219:TyrKc                                 | 4  | 1.60643  | 2.34933 | 2.39E-01 | FGR, RIPK1, NEK6, CSI | 131 | 118  | 9079  | 1.00000 | 0.95784 | 95.55803 |
| SP_PIR_KEYWORDS | phosphotransferase                            | 5  | 2.00803  | 1.94505 | 2.54E-01 | GCK, FGR, RIPK1, PRK  | 246 | 201  | 19235 | 1.00000 | 0.85132 | 98.17908 |
| GOTERM_BP_FAT   | GO:0006468~protein amino acid phosphoryla     | 12 | 4.81928  | 1.31558 | 2.99E-01 | SGK223, APP, SGK2, F  | 185 | 667  | 13528 | 1.00000 | 0.99663 | 99.67305 |
| GOTERM_BP_FAT   | GO:0006793~phosphorus metabolic process       | 16 | 6.42570  | 1.20246 | 3.45E-01 | SGK2, FGR, DUSP10, A  | 185 | 973  | 13528 | 1.00000 | 0.99618 | 99.89147 |
| GOTERM_BP_FAT   | GO:0006796~phosphate metabolic process        | 16 | 6.42570  | 1.20246 | 3.45E-01 | SGK2, FGR, DUSP10, A  | 185 | 973  | 13528 | 1.00000 | 0.99618 | 99.89147 |
| GOTERM_MF_FAT   | GO:0004713~protein tyrosine kinase activity   | 4  | 1.60643  | 1.81886 | 3.72E-01 | SGK223, FGR, NEK6, C  | 172 | 166  | 12983 | 1.00000 | 0.99860 | 99.84762 |
| INTERPRO        | IPR008266:Tyrosine protein kinase, active sit | 3  | 1.20482  | 2.28990 | 3.76E-01 | SGK223, FGR, CSF1R    | 225 | 97   | 16659 | 1.00000 | 0.99616 | 99.88336 |
| SP_PIR_KEYWORDS | transferase                                   | 20 | 8.03213  | 1.12182 | 4.14E-01 | MOGAT1, SGK2, FGR, I  | 246 | 1394 | 19235 | 1.00000 | 0.93291 | 99.93145 |
| SP_PIR_KEYWORDS | tyrosine-protein kinase                       | 3  | 1.20482  | 2.11327 | 4.14E-01 | SGK223, FGR, CSF1R    | 246 | 111  | 19235 | 1.00000 | 0.93051 | 99.93219 |
| UP_SEQ_FEATURE  | active site:Proton acceptor                   | 10 | 4.01606  | 1.18078 | 4.67E-01 | SGK223, SGK2, LDHAL   | 246 | 658  | 19113 | 1.00000 | 0.99998 | 99.99399 |
| UP_SEQ_FEATURE  | binding site:ATP                              | 8  | 3.21285  | 1.14679 | 5.45E-01 | SGK223, SGK2, GCK, F  | 246 | 542  | 19113 | 1.00000 | 1.00000 | 99.99949 |
| UP_SEQ_FEATURE  | domain:Protein kinase                         | 7  | 2.81124  | 1.15963 | 5.59E-01 | SGK223, SGK2, FGR, R  | 246 | 469  | 19113 | 1.00000 | 1.00000 | 99.99969 |
| SP_PIR_KEYWORDS | nucleotide-binding                            | 22 | 8.83534  | 1.02029 | 5.76E-01 | GNAT1, SEPT4, SGK2,   | 246 | 1686 | 19235 | 1.00000 | 0.97391 | 99.99918 |
| UP_SEQ_FEATURE  | nucleotide phosphate-binding region:ATP       | 13 | 5.22088  | 1.04993 | 5.81E-01 | SGK2, FGR, ABCB6, SC  | 246 | 962  | 19113 | 1.00000 | 1.00000 | 99.99985 |
| GOTERM_MF_FAT   | GO:0032559~adenyl ribonucleotide binding      | 20 | 8.03213  | 1.00845 | 6.05E-01 | SGK2, FGR, TRPV1, M)  | 172 | 1497 | 12983 | 1.00000 | 0.99934 | 99.99975 |
| INTERPRO        | IPR000719:Protein kinase, core                | 7  | 2.81124  | 1.08882 | 6.21E-01 | SGK223, SGK2, FGR, R  | 225 | 476  | 16659 | 1.00000 | 0.99993 | 99.99991 |
| GOTERM_MF_FAT   | GO:0001883~purine nucleoside binding          | 21 | 8.43373  | 0.99009 | 6.35E-01 | GNAT1, SGK2, FGR, TF  | 172 | 1601 | 12983 | 1.00000 | 0.99938 | 99.99992 |
| GOTERM_MF_FAT   | GO:0032555~purine ribonucleotide binding      | 24 | 9.63855  | 0.98670 | 6.36E-01 | GNAT1, SEPT4, SGK2,   | 172 | 1836 | 12983 | 1.00000 | 0.99930 | 99.99992 |
| GOTERM_MF_FAT   | GO:0032553~ribonucleotide binding             | 24 | 9.63855  | 0.98670 | 6.36E-01 | GNAT1, SEPT4, SGK2,   | 172 | 1836 | 12983 | 1.00000 | 0.99930 | 99.99992 |
| GOTERM_MF_FAT   | GO:0001882~nucleoside binding                 | 21 | 8.43373  | 0.98333 | 6.48E-01 | GNAT1, SGK2, FGR, TF  | 172 | 1612 | 12983 | 1.00000 | 0.99918 | 99.99995 |
| SP_PIR_KEYWORDS | kinase                                        | 9  | 3.61446  | 1.02285 | 6.53E-01 | SGK223, SGK2, GCK, F  | 246 | 688  | 19235 | 1.00000 | 0.98621 | 99.99995 |
| SP_PIR_KEYWORDS | magnesium                                     | 6  | 2.40964  | 1.06142 | 6.67E-01 | ATP9A, ITGAE, COMT,   | 246 | 442  | 19235 | 1.00000 | 0.98767 | 99.99997 |
| GOTERM_MF_FAT   | GO:0004672~protein kinase activity            | 8  | 3.21285  | 0.99647 | 6.92E-01 | SGK223, SGK2, FGR, R  | 172 | 606  | 12983 | 1.00000 | 0.99938 | 99.99999 |
| GOTERM_MF_FAT   | GO:0030554~adenyl nucleotide binding          | 20 | 8.03213  | 0.95729 | 6.96E-01 | SGK2, FGR, TRPV1, M)  | 172 | 1577 | 12983 | 1.00000 | 0.99936 | 99.99999 |
| GOTERM_MF_FAT   | GO:0017076~purine nucleotide binding          | 24 | 9.63855  | 0.94452 | 7.20E-01 | GNAT1, SEPT4, SGK2,   | 172 | 1918 | 12983 | 1.00000 | 0.99956 | #####    |
| SP_PIR_KEYWORDS | atp-binding                                   | 16 | 6.42570  | 0.94348 | 7.20E-01 | SGK2, FGR, MYO7B, TF  | 246 | 1326 | 19235 | 1.00000 | 0.99231 | #####    |
| INTERPRO        | IPR017441:Protein kinase, ATP binding site    | 6  | 2.40964  | 0.97635 | 7.36E-01 | SGK223, SGK2, FGR, T  | 225 | 455  | 16659 | 1.00000 | 0.99999 | #####    |
| GOTERM_MF_FAT   | GO:0005524~ATP binding                        | 18 | 7.22892  | 0.91990 | 7.58E-01 | SGK2, FGR, MYO7B, TF  | 172 | 1477 | 12983 | 1.00000 | 0.99974 | #####    |
| SP_PIR_KEYWORDS | ATP                                           | 3  | 1.20482  | 0.99395 | 8.05E-01 | GCK, FGR, CSF1R       | 246 | 236  | 19235 | 1.00000 | 0.99642 | #####    |
| GOTERM_MF_FAT   | GO:0004674~protein serine/threonine kinase    | 5  | 2.00803  | 0.87770 | 8.23E-01 | SGK2, RIPK1, ITGAE, T | 172 | 430  | 12983 | 1.00000 | 0.99986 | #####    |
| GOTERM_MF_FAT   | GO:0000166~nucleotide binding                 | 26 | 10.44177 | 0.87419 | 8.49E-01 | SEPT4, FGR, TRPV1, M  | 172 | 2245 | 12983 | 1.00000 | 0.99991 | #####    |
| GOTERM_MF_FAT   | GO:0000287~magnesium ion binding              | 5  | 2.00803  | 0.83498 | 8.51E-01 | ATP9A, ITGAE, COMT,   | 172 | 452  | 12983 | 1.00000 | 0.99991 | #####    |
| INTERPRO        | IPR008271:Serine/threonine protein kinase, a  | 4  | 1.60643  | 0.83661 | 8.58E-01 | SGK2, RIPK1, TSSK4, M | 225 | 354  | 16659 | 1.00000 | 1.00000 | #####    |
| INTERPRO        | IPR017442:Serine/threonine protein kinase-re  | 4  | 1.60643  | 0.82496 | 8.65E-01 | SGK2, RIPK1, TSSK4, M | 225 | 359  | 16659 | 1.00000 | 1.00000 | #####    |
| INTERPRO        | IPR002290:Serine/threonine protein kinase     | 3  | 1.20482  | 0.85761 | 8.66E-01 | SGK2, TSSK4, NEK6     | 225 | 259  | 16659 | 1.00000 | 1.00000 | #####    |
| SP_PIR_KEYWORDS | serine/threonine-protein kinase               | 4  | 1.60643  | 0.82090 | 8.67E-01 | SGK2, RIPK1, TSSK4, M | 246 | 381  | 19235 | 1.00000 | 0.99880 | #####    |
| SMART           | SM00220:S_TKc                                 | 3  | 1.20482  | 0.80276 | 8.90E-01 | SGK2, TSSK4, NEK6     | 131 | 259  | 9079  | 1.00000 | 1.00000 | #####    |

## Annotation Cluster 61 Enrichment Score: 0.2384226590198531

| Category        | Term                                         | Count | %       | Fold Enrich | PValue   | Genes                | List Total | Pop Hits | Pop Total | Bonferroni | Benjamini | FDR      |
|-----------------|----------------------------------------------|-------|---------|-------------|----------|----------------------|------------|----------|-----------|------------|-----------|----------|
| SP_PIR_KEYWORDS | Protease                                     | 8     | 3.21285 | 1.29241     | 4.30E-01 | APP, MMP21, KLK3, AD | 246        | 484      | 19235     | 1.00000    | 0.93668   | 99.95289 |
| GOTERM_MF_FAT   | GO:0008233~peptidase activity                | 9     | 3.61446 | 1.18352     | 4.87E-01 | APP, MMP21, KLK3, AD | 172        | 574      | 12983     | 1.00000    | 0.99919   | 99.99067 |
| SP_PIR_KEYWORDS | zymogen                                      | 4     | 1.60643 | 1.51827     | 4.90E-01 | MMP21, KLK3, ADAM3C  | 246        | 206      | 19235     | 1.00000    | 0.95440   | 99.98973 |
| SP_PIR_KEYWORDS | Serine protease                              | 3     | 1.20482 | 1.72480     | 5.19E-01 | KLK3, RHBDL2, C1S    | 246        | 136      | 19235     | 1.00000    | 0.96196   | 99.99538 |
| GOTERM_MF_FAT   | GO:0004175~endopeptidase activity            | 6     | 2.40964 | 1.20772     | 5.52E-01 | MMP21, KLK3, ADAM3C  | 172        | 375      | 12983     | 1.00000    | 0.99938   | 99.99862 |
| GOTERM_MF_FAT   | GO:0004252~serine-type endopeptidase acti    | 3     | 1.20482 | 1.47044     | 6.05E-01 | KLK3, RHBDL2, C1S    | 172        | 154      | 12983     | 1.00000    | 0.99925   | 99.99976 |
| GOTERM_MF_FAT   | GO:0008236~serine-type peptidase activity    | 3     | 1.20482 | 1.27218     | 6.83E-01 | KLK3, RHBDL2, C1S    | 172        | 178      | 12983     | 1.00000    | 0.99955   | 99.99999 |
| GOTERM_MF_FAT   | GO:0017171~serine hydrolase activity         | 3     | 1.20482 | 1.25804     | 6.89E-01 | KLK3, RHBDL2, C1S    | 172        | 180      | 12983     | 1.00000    | 0.99948   | 99.99999 |
| GOTERM_MF_FAT   | GO:0070011~peptidase activity, acting on L-ε | 6     | 2.40964 | 0.82495     | 8.55E-01 | MMP21, KLK3, ADAM3C  | 172        | 549      | 12983     | 1.00000    | 0.99991   | #####    |

## Annotation Cluster 62 Enrichment Score: 0.23038944039136383

| Category      | Term                                     | Count | %       | Fold Enrich | PValue   | Genes                | List Total | Pop Hits | Pop Total | Bonferroni | Benjamini | FDR      |
|---------------|------------------------------------------|-------|---------|-------------|----------|----------------------|------------|----------|-----------|------------|-----------|----------|
| GOTERM_BP_FAT | GO:0007610~behavior                      | 9     | 3.61446 | 1.40324     | 3.07E-01 | MCHR1, APP, CCR6, IL | 185        | 469      | 13528     | 1.00000    | 0.99675   | 99.73110 |
| GOTERM_BP_FAT | GO:0019226~transmission of nerve impulse | 5     | 2.00803 | 1.04463     | 7.05E-01 | KCNMB3, APP, P2RX3,  | 185        | 350      | 13528     | 1.00000    | 0.99983   | #####    |
| GOTERM_BP_FAT | GO:0007267~cell-cell signaling           | 8     | 3.21285 | 0.97499     | 7.13E-01 | APP, PTGIR, P2RX3, T | 185        | 600      | 13528     | 1.00000    | 0.99985   | #####    |
| GOTERM_BP_FAT | GO:0007268~synaptic transmission         | 4     | 1.60643 | 0.98153     | 7.75E-01 | APP, P2RX3, APBA2, C | 185        | 298      | 13528     | 1.00000    | 0.99994   | #####    |

| Annotation Cluster 63 |                                              | Enrichment Score: 0.19092556837955257 |         |             |          |                       |            |          |           |            |           |          |
|-----------------------|----------------------------------------------|---------------------------------------|---------|-------------|----------|-----------------------|------------|----------|-----------|------------|-----------|----------|
| Category              | Term                                         | Count                                 | %       | Fold Enrich | PValue   | Genes                 | List Total | Pop Hits | Pop Total | Bonferroni | Benjamini | FDR      |
| GOTERM_BP_FAT         | GO:0010324~membrane invagination             | 4                                     | 1.60643 | 1.32953     | 5.78E-01 | ASGR2, APP, FCN2, CC  | 185        | 220      | 13528     | 1.00000    | 0.99910   | 99.99991 |
| GOTERM_BP_FAT         | GO:0006897~endocytosis                       | 4                                     | 1.60643 | 1.32953     | 5.78E-01 | ASGR2, APP, FCN2, CC  | 185        | 220      | 13528     | 1.00000    | 0.99910   | 99.99991 |
| GOTERM_BP_FAT         | GO:0016192~vesicle-mediated transport        | 8                                     | 3.21285 | 1.01562     | 6.73E-01 | PREB, ASGR2, APP, A   | 185        | 576      | 13528     | 1.00000    | 0.99970   | #####    |
| GOTERM_BP_FAT         | GO:0016044~membrane organization             | 5                                     | 2.00803 | 0.95964     | 7.66E-01 | PREB, ASGR2, APP, FC  | 185        | 381      | 13528     | 1.00000    | 0.99993   | #####    |
| Annotation Cluster 64 |                                              | Enrichment Score: 0.17154057874361137 |         |             |          |                       |            |          |           |            |           |          |
| Category              | Term                                         | Count                                 | %       | Fold Enrich | PValue   | Genes                 | List Total | Pop Hits | Pop Total | Bonferroni | Benjamini | FDR      |
| GOTERM_BP_FAT         | GO:0007283~spermatogenesis                   | 5                                     | 2.00803 | 1.18708     | 6.07E-01 | TXNDC2, CETN2, AQP7   | 185        | 308      | 13528     | 1.00000    | 0.99928   | 99.99997 |
| GOTERM_BP_FAT         | GO:0048232~male gamete generation            | 5                                     | 2.00803 | 1.18708     | 6.07E-01 | TXNDC2, CETN2, AQP7   | 185        | 308      | 13528     | 1.00000    | 0.99928   | 99.99997 |
| GOTERM_BP_FAT         | GO:0048609~reproductive process in a multic  | 7                                     | 2.81124 | 1.05107     | 6.54E-01 | TXNDC2, CETN2, AQP7   | 185        | 487      | 13528     | 1.00000    | 0.99960   | #####    |
| GOTERM_BP_FAT         | GO:0032504~multicellular organism reproduc   | 7                                     | 2.81124 | 1.05107     | 6.54E-01 | TXNDC2, CETN2, AQP7   | 185        | 487      | 13528     | 1.00000    | 0.99960   | #####    |
| GOTERM_BP_FAT         | GO:0019953~sexual reproduction               | 6                                     | 2.40964 | 0.95796     | 7.51E-01 | DNALI1, TXNDC2, CETI  | 185        | 458      | 13528     | 1.00000    | 0.99991   | #####    |
| GOTERM_BP_FAT         | GO:0007276~gamete generation                 | 5                                     | 2.00803 | 0.92562     | 7.90E-01 | TXNDC2, CETN2, AQP7   | 185        | 395      | 13528     | 1.00000    | 0.99995   | #####    |
| Annotation Cluster 65 |                                              | Enrichment Score: 0.15747117835020613 |         |             |          |                       |            |          |           |            |           |          |
| Category              | Term                                         | Count                                 | %       | Fold Enrich | PValue   | Genes                 | List Total | Pop Hits | Pop Total | Bonferroni | Benjamini | FDR      |
| INTERPRO              | IPR015943:WD40/YVTN repeat-like              | 6                                     | 2.40964 | 1.48080     | 3.77E-01 | PREB, SEMA4G, PLXN    | 225        | 300      | 16659     | 1.00000    | 0.99573   | 99.88719 |
| UP_SEQ_FEATURE        | repeat:WD 3                                  | 4                                     | 1.60643 | 1.17276     | 6.63E-01 | PREB, DCAF12L1, FBX   | 246        | 265      | 19113     | 1.00000    | 1.00000   | #####    |
| UP_SEQ_FEATURE        | repeat:WD 1                                  | 4                                     | 1.60643 | 1.13424     | 6.85E-01 | PREB, DCAF12L1, FBX   | 246        | 274      | 19113     | 1.00000    | 1.00000   | #####    |
| UP_SEQ_FEATURE        | repeat:WD 2                                  | 4                                     | 1.60643 | 1.13424     | 6.85E-01 | PREB, DCAF12L1, FBX   | 246        | 274      | 19113     | 1.00000    | 1.00000   | #####    |
| SP_PIR_KEYWORDS       | wd repeat                                    | 4                                     | 1.60643 | 1.13320     | 6.86E-01 | PREB, DCAF12L1, FBX   | 246        | 276      | 19235     | 1.00000    | 0.98917   | 99.99999 |
| INTERPRO              | IPR019775:WD40 repeat, conserved site        | 4                                     | 1.60643 | 1.06917     | 7.23E-01 | PREB, DCAF12L1, FBX   | 225        | 277      | 16659     | 1.00000    | 0.99999   | #####    |
| UP_SEQ_FEATURE        | repeat:WD 4                                  | 3                                     | 1.20482 | 0.92863     | 8.35E-01 | DCAF12L1, FBXW12, P   | 246        | 251      | 19113     | 1.00000    | 1.00000   | #####    |
| INTERPRO              | IPR001680:WD40 repeat                        | 3                                     | 1.20482 | 0.83504     | 8.76E-01 | PREB, DCAF12L1, PPP   | 225        | 266      | 16659     | 1.00000    | 1.00000   | #####    |
| SMART                 | SM00320:WD40                                 | 3                                     | 1.20482 | 0.78164     | 8.99E-01 | PREB, DCAF12L1, PPP   | 131        | 266      | 9079      | 1.00000    | 1.00000   | #####    |
| Annotation Cluster 66 |                                              | Enrichment Score: 0.15173013453018194 |         |             |          |                       |            |          |           |            |           |          |
| Category              | Term                                         | Count                                 | %       | Fold Enrich | PValue   | Genes                 | List Total | Pop Hits | Pop Total | Bonferroni | Benjamini | FDR      |
| GOTERM_CC_FAT         | GO:0030141~secretory granule                 | 5                                     | 2.00803 | 2.11343     | 2.09E-01 | APP, SPACA3, LACRT,   | 168        | 180      | 12782     | 1.00000    | 0.77505   | 94.72788 |
| GOTERM_CC_FAT         | GO:0044433~cytoplasmic vesicle part          | 3                                     | 1.20482 | 1.22059     | 7.05E-01 | APP, CUZD1, SERPINA   | 168        | 187      | 12782     | 1.00000    | 0.98533   | 99.99998 |
| GOTERM_CC_FAT         | GO:0016023~cytoplasmic membrane-bounde       | 5                                     | 2.00803 | 0.69167     | 9.33E-01 | APP, SPACA3, LACRT,   | 168        | 550      | 12782     | 1.00000    | 0.99953   | #####    |
| GOTERM_CC_FAT         | GO:0031988~membrane-bounded vesicle          | 5                                     | 2.00803 | 0.66975     | 9.43E-01 | APP, SPACA3, LACRT,   | 168        | 568      | 12782     | 1.00000    | 0.99966   | #####    |
| GOTERM_CC_FAT         | GO:0031410~cytoplasmic vesicle               | 5                                     | 2.00803 | 0.59255     | 9.71E-01 | APP, SPACA3, LACRT,   | 168        | 642      | 12782     | 1.00000    | 0.99991   | #####    |
| GOTERM_CC_FAT         | GO:0031982~vesicle                           | 5                                     | 2.00803 | 0.56779     | 9.78E-01 | APP, SPACA3, LACRT,   | 168        | 670      | 12782     | 1.00000    | 0.99995   | #####    |
| Annotation Cluster 67 |                                              | Enrichment Score: 0.13514567945625372 |         |             |          |                       |            |          |           |            |           |          |
| Category              | Term                                         | Count                                 | %       | Fold Enrich | PValue   | Genes                 | List Total | Pop Hits | Pop Total | Bonferroni | Benjamini | FDR      |
| GOTERM_BP_FAT         | GO:0006928~cell motion                       | 7                                     | 2.81124 | 1.07762     | 6.31E-01 | APP, DNALI1, CCR6, IL | 185        | 475      | 13528     | 1.00000    | 0.99948   | 99.99999 |
| GOTERM_BP_FAT         | GO:0016477~cell migration                    | 4                                     | 1.60643 | 1.05977     | 7.29E-01 | IL16, ARHGFE7, PSG2,  | 185        | 276      | 13528     | 1.00000    | 0.99987   | #####    |
| GOTERM_BP_FAT         | GO:0051674~localization of cell              | 4                                     | 1.60643 | 0.95276     | 7.92E-01 | IL16, ARHGFE7, PSG2,  | 185        | 307      | 13528     | 1.00000    | 0.99995   | #####    |
| GOTERM_BP_FAT         | GO:0048870~cell motility                     | 4                                     | 1.60643 | 0.95276     | 7.92E-01 | IL16, ARHGFE7, PSG2,  | 185        | 307      | 13528     | 1.00000    | 0.99995   | #####    |
| Annotation Cluster 68 |                                              | Enrichment Score: 0.13501951054469422 |         |             |          |                       |            |          |           |            |           |          |
| Category              | Term                                         | Count                                 | %       | Fold Enrich | PValue   | Genes                 | List Total | Pop Hits | Pop Total | Bonferroni | Benjamini | FDR      |
| INTERPRO              | IPR008957:Fibronectin, type III-like fold    | 3                                     | 1.20482 | 1.20717     | 7.11E-01 | MYBPH, COL12A1, MYE   | 225        | 184      | 16659     | 1.00000    | 0.99999   | #####    |
| INTERPRO              | IPR003961:Fibronectin, type III              | 3                                     | 1.20482 | 1.16905     | 7.28E-01 | MYBPH, COL12A1, MYE   | 225        | 190      | 16659     | 1.00000    | 0.99999   | #####    |
| SMART                 | SM00060:FN3                                  | 3                                     | 1.20482 | 1.09429     | 7.61E-01 | MYBPH, COL12A1, MYE   | 131        | 190      | 9079      | 1.00000    | 0.99997   | 99.99999 |
| Annotation Cluster 69 |                                              | Enrichment Score: 0.11638516720182036 |         |             |          |                       |            |          |           |            |           |          |
| Category              | Term                                         | Count                                 | %       | Fold Enrich | PValue   | Genes                 | List Total | Pop Hits | Pop Total | Bonferroni | Benjamini | FDR      |
| GOTERM_BP_FAT         | GO:0001932~regulation of protein amino acid  | 4                                     | 1.60643 | 1.69074     | 4.15E-01 | RIPK1, PRKAR1B, LACI  | 185        | 173      | 13528     | 1.00000    | 0.99715   | 99.98228 |
| GOTERM_BP_FAT         | GO:0042325~regulation of phosphorylation     | 6                                     | 2.40964 | 0.94151     | 7.64E-01 | APP, PPP1R14D, RIPK1  | 185        | 466      | 13528     | 1.00000    | 0.99993   | #####    |
| GOTERM_BP_FAT         | GO:0031399~regulation of protein modificatio | 4                                     | 1.60643 | 0.99152     | 7.69E-01 | RIPK1, PRKAR1B, LACI  | 185        | 295      | 13528     | 1.00000    | 0.99993   | #####    |
| GOTERM_BP_FAT         | GO:0019220~regulation of phosphate metabo    | 6                                     | 2.40964 | 0.90463     | 7.94E-01 | APP, PPP1R14D, RIPK1  | 185        | 485      | 13528     | 1.00000    | 0.99995   | #####    |
| GOTERM_BP_FAT         | GO:0051174~regulation of phosphorus metat    | 6                                     | 2.40964 | 0.90463     | 7.94E-01 | APP, PPP1R14D, RIPK1  | 185        | 485      | 13528     | 1.00000    | 0.99995   | #####    |

|               |                                               |   |         |         |          |                      |     |     |       |         |         |       |
|---------------|-----------------------------------------------|---|---------|---------|----------|----------------------|-----|-----|-------|---------|---------|-------|
| GOTERM_BP_FAT | GO:0045859~regulation of protein kinase acti  | 4 | 1.60643 | 0.84782 | 8.52E-01 | APP, RIPK1, PRKAR1B, | 185 | 345 | 13528 | 1.00000 | 0.99999 | ##### |
| GOTERM_BP_FAT | GO:0043549~regulation of kinase activity      | 4 | 1.60643 | 0.81932 | 8.68E-01 | APP, RIPK1, PRKAR1B, | 185 | 357 | 13528 | 1.00000 | 0.99999 | ##### |
| GOTERM_BP_FAT | GO:0051338~regulation of transferase activity | 4 | 1.60643 | 0.78628 | 8.85E-01 | APP, RIPK1, PRKAR1B, | 185 | 372 | 13528 | 1.00000 | 1.00000 | ##### |
| GOTERM_BP_FAT | GO:0032268~regulation of cellular protein me  | 5 | 2.00803 | 0.77135 | 8.90E-01 | APP, RIPK1, PRKAR1B, | 185 | 474 | 13528 | 1.00000 | 1.00000 | ##### |

Annotation Cluster 70 Enrichment Score: 0.11397802536112175

| Category        | Term                | Count | %       | Fold Enrich | PValue   | Genes               | List Total | Pop Hits | Pop Total | Bonferroni | Benjamini | FDR   |
|-----------------|---------------------|-------|---------|-------------|----------|---------------------|------------|----------|-----------|------------|-----------|-------|
| UP_SEQ_FEATURE  | repeat:LRR 3        | 4     | 1.60643 | 1.03940     | 7.41E-01 | ISLR, SYNE2, PRAMEF | 246        | 299      | 19113     | 1.00000    | 1.00000   | ##### |
| UP_SEQ_FEATURE  | repeat:LRR 1        | 4     | 1.60643 | 0.97730     | 7.77E-01 | ISLR, SYNE2, PRAMEF | 246        | 318      | 19113     | 1.00000    | 1.00000   | ##### |
| UP_SEQ_FEATURE  | repeat:LRR 2        | 4     | 1.60643 | 0.97423     | 7.79E-01 | ISLR, SYNE2, PRAMEF | 246        | 319      | 19113     | 1.00000    | 1.00000   | ##### |
| SP_PIR_KEYWORDS | leucine-rich repeat | 4     | 1.60643 | 0.97132     | 7.81E-01 | ISLR, SYNE2, PRAMEF | 246        | 322      | 19235     | 1.00000    | 0.99589   | ##### |

Annotation Cluster 71 Enrichment Score: 0.09543261880748943

| Category      | Term                                       | Count | %       | Fold Enrich | PValue   | Genes                 | List Total | Pop Hits | Pop Total | Bonferroni | Benjamini | FDR   |
|---------------|--------------------------------------------|-------|---------|-------------|----------|-----------------------|------------|----------|-----------|------------|-----------|-------|
| GOTERM_MF_FAT | GO:0042802~identical protein binding       | 8     | 3.21285 | 0.94353     | 7.45E-01 | APP, CLDN18, SP100, T | 172        | 640      | 12983     | 1.00000    | 0.99968   | ##### |
| GOTERM_MF_FAT | GO:0042803~protein homodimerization activi | 4     | 1.60643 | 0.90398     | 8.20E-01 | SP100, THRA, P2RX3, C | 172        | 334      | 12983     | 1.00000    | 0.99987   | ##### |
| GOTERM_MF_FAT | GO:0046983~protein dimerization activity   | 6     | 2.40964 | 0.83560     | 8.47E-01 | JDP2, SP100, THRA, P2 | 172        | 542      | 12983     | 1.00000    | 0.99992   | ##### |

Annotation Cluster 72 Enrichment Score: 0.09323713945277244

| Category      | Term                                    | Count | %       | Fold Enrich | PValue   | Genes               | List Total | Pop Hits | Pop Total | Bonferroni | Benjamini | FDR      |
|---------------|-----------------------------------------|-------|---------|-------------|----------|---------------------|------------|----------|-----------|------------|-----------|----------|
| GOTERM_BP_FAT | GO:0051259~protein oligomerization      | 4     | 1.60643 | 1.68102     | 4.19E-01 | VCP, TRPV5, COLEC12 | 185        | 174      | 13528     | 1.00000    | 0.99721   | 99.98414 |
| GOTERM_BP_FAT | GO:0070271~protein complex biogenesis   | 5     | 2.00803 | 0.72400     | 9.17E-01 | VCP, TRPV5, COLEC12 | 185        | 505      | 13528     | 1.00000    | 1.00000   | #####    |
| GOTERM_BP_FAT | GO:0006461~protein complex assembly     | 5     | 2.00803 | 0.72400     | 9.17E-01 | VCP, TRPV5, COLEC12 | 185        | 505      | 13528     | 1.00000    | 1.00000   | #####    |
| GOTERM_BP_FAT | GO:0065003~macromolecular complex asser | 5     | 2.00803 | 0.54981     | 9.82E-01 | VCP, TRPV5, COLEC12 | 185        | 665      | 13528     | 1.00000    | 1.00000   | #####    |
| GOTERM_BP_FAT | GO:0043933~macromolecular complex subur | 5     | 2.00803 | 0.51496     | 9.89E-01 | VCP, TRPV5, COLEC12 | 185        | 710      | 13528     | 1.00000    | 1.00000   | #####    |

Annotation Cluster 73 Enrichment Score: 0.09171881125317635

| Category      | Term                                          | Count | %       | Fold Enrich | PValue   | Genes                 | List Total | Pop Hits | Pop Total | Bonferroni | Benjamini | FDR   |
|---------------|-----------------------------------------------|-------|---------|-------------|----------|-----------------------|------------|----------|-----------|------------|-----------|-------|
| GOTERM_BP_FAT | GO:0051345~positive regulation of hydrolase   | 3     | 1.20482 | 1.22555     | 7.03E-01 | TNNT2, MYL4, VCP      | 185        | 179      | 13528     | 1.00000    | 0.99983   | ##### |
| GOTERM_BP_FAT | GO:0044093~positive regulation of molecular   | 7     | 2.81124 | 0.87350     | 8.14E-01 | TNNT2, MYL4, SP100, \ | 185        | 586      | 13528     | 1.00000    | 0.99997   | ##### |
| GOTERM_BP_FAT | GO:0043085~positive regulation of catalytic a | 5     | 2.00803 | 0.70312     | 9.27E-01 | TNNT2, MYL4, VCP, RIF | 185        | 520      | 13528     | 1.00000    | 1.00000   | ##### |

Annotation Cluster 74 Enrichment Score: 0.08821045522597847

| Category      | Term                                         | Count | %       | Fold Enrich | PValue   | Genes                | List Total | Pop Hits | Pop Total | Bonferroni | Benjamini | FDR      |
|---------------|----------------------------------------------|-------|---------|-------------|----------|----------------------|------------|----------|-----------|------------|-----------|----------|
| GOTERM_BP_FAT | GO:0006917~induction of apoptosis            | 5     | 2.00803 | 1.14257     | 6.37E-01 | FGD2, APP, ARHGFEF7, | 185        | 320      | 13528     | 1.00000    | 0.99950   | 99.99999 |
| GOTERM_BP_FAT | GO:0012502~induction of programmed cell de   | 5     | 2.00803 | 1.13901     | 6.39E-01 | FGD2, APP, ARHGFEF7, | 185        | 321      | 13528     | 1.00000    | 0.99950   | 99.99999 |
| GOTERM_BP_FAT | GO:0043065~positive regulation of apoptosis  | 5     | 2.00803 | 0.85028     | 8.41E-01 | FGD2, APP, ARHGFEF7, | 185        | 430      | 13528     | 1.00000    | 0.99999   | #####    |
| GOTERM_BP_FAT | GO:0043068~positive regulation of programr   | 5     | 2.00803 | 0.84439     | 8.45E-01 | FGD2, APP, ARHGFEF7, | 185        | 433      | 13528     | 1.00000    | 0.99999   | #####    |
| GOTERM_BP_FAT | GO:0010942~positive regulation of cell death | 5     | 2.00803 | 0.84051     | 8.47E-01 | FGD2, APP, ARHGFEF7, | 185        | 435      | 13528     | 1.00000    | 0.99999   | #####    |
| GOTERM_BP_FAT | GO:0042981~regulation of apoptosis           | 8     | 3.21285 | 0.72761     | 9.26E-01 | FGD2, APP, VCP, ARHC | 185        | 804      | 13528     | 1.00000    | 1.00000   | #####    |
| GOTERM_BP_FAT | GO:0043067~regulation of programmed cell c   | 8     | 3.21285 | 0.72044     | 9.31E-01 | FGD2, APP, VCP, ARHC | 185        | 812      | 13528     | 1.00000    | 1.00000   | #####    |
| GOTERM_BP_FAT | GO:0010941~regulation of cell death          | 8     | 3.21285 | 0.71778     | 9.32E-01 | FGD2, APP, VCP, ARHC | 185        | 815      | 13528     | 1.00000    | 1.00000   | #####    |

Annotation Cluster 75 Enrichment Score: 0.08616135533222814

| Category        | Term                                     | Count | %       | Fold Enrich | PValue   | Genes               | List Total | Pop Hits | Pop Total | Bonferroni | Benjamini | FDR   |
|-----------------|------------------------------------------|-------|---------|-------------|----------|---------------------|------------|----------|-----------|------------|-----------|-------|
| UP_SEQ_FEATURE  | nucleotide phosphate-binding region:GTP  | 4     | 1.60643 | 1.05349     | 7.32E-01 | GNAT1, SEPT4, RHOB1 | 246        | 295      | 19113     | 1.00000    | 1.00000   | ##### |
| GOTERM_MF_FAT   | GO:0003924~GTPase activity               | 3     | 1.20482 | 1.07321     | 7.70E-01 | GNAT1, SEPT4, SEPT9 | 172        | 211      | 12983     | 1.00000    | 0.99975   | ##### |
| SP_PIR_KEYWORDS | gtp-binding                              | 4     | 1.60643 | 0.95065     | 7.93E-01 | GNAT1, SEPT4, RHOB1 | 246        | 329      | 19235     | 1.00000    | 0.99645   | ##### |
| GOTERM_MF_FAT   | GO:0005525~GTP binding                   | 4     | 1.60643 | 0.81164     | 8.72E-01 | GNAT1, SEPT4, RHOB1 | 172        | 372      | 12983     | 1.00000    | 0.99994   | ##### |
| GOTERM_MF_FAT   | GO:0019001~guanyl nucleotide binding     | 4     | 1.60643 | 0.79039     | 8.83E-01 | GNAT1, SEPT4, RHOB1 | 172        | 382      | 12983     | 1.00000    | 0.99996   | ##### |
| GOTERM_MF_FAT   | GO:0032561~guanyl ribonucleotide binding | 4     | 1.60643 | 0.79039     | 8.83E-01 | GNAT1, SEPT4, RHOB1 | 172        | 382      | 12983     | 1.00000    | 0.99996   | ##### |

Annotation Cluster 76 Enrichment Score: 0.07772291798072627

| Category        | Term                                 | Count | %       | Fold Enrich | PValue   | Genes                | List Total | Pop Hits | Pop Total | Bonferroni | Benjamini | FDR   |
|-----------------|--------------------------------------|-------|---------|-------------|----------|----------------------|------------|----------|-----------|------------|-----------|-------|
| GOTERM_MF_FAT   | GO:0009055~electron carrier activity | 3     | 1.20482 | 1.02465     | 7.92E-01 | CYP2A13, ALDH4A1, C' | 172        | 221      | 12983     | 1.00000    | 0.99984   | ##### |
| SP_PIR_KEYWORDS | oxidoreductase                       | 6     | 2.40964 | 0.83478     | 8.47E-01 | CYP2A13, LDHAL6B, AI | 246        | 562      | 19235     | 1.00000    | 0.99821   | ##### |
| GOTERM_BP_FAT   | GO:0055114~oxidation reduction       | 7     | 2.81124 | 0.80105     | 8.72E-01 | CYP2A13, LDHAL6B, AI | 185        | 639      | 13528     | 1.00000    | 0.99999   | ##### |

| Annotation Cluster 77 |                                               | Enrichment Score: 0.06282467897970034  |          |             |          |                       |            |          |           |            |           |          |
|-----------------------|-----------------------------------------------|----------------------------------------|----------|-------------|----------|-----------------------|------------|----------|-----------|------------|-----------|----------|
| Category              | Term                                          | Count                                  | %        | Fold Enrich | PValue   | Genes                 | List Total | Pop Hits | Pop Total | Bonferroni | Benjamini | FDR      |
| GOTERM_BP_FAT         | GO:0051046~regulation of secretion            | 3                                      | 1.20482  | 1.08600     | 7.64E-01 | GCK, LACRT, NEUROD    | 185        | 202      | 13528     | 1.00000    | 0.99993   | #####    |
| GOTERM_BP_FAT         | GO:0060341~regulation of cellular localizati  | 3                                      | 1.20482  | 0.88457     | 8.54E-01 | GCK, LACRT, NEUROD    | 185        | 248      | 13528     | 1.00000    | 0.99999   | #####    |
| GOTERM_BP_FAT         | GO:0010604~positive regulation of macromol    | 6                                      | 2.40964  | 0.51196     | 9.92E-01 | APP, SP100, THRA, GC  | 185        | 857      | 13528     | 1.00000    | 1.00000   | #####    |
| Annotation Cluster 78 |                                               | Enrichment Score: 0.05970860988235009  |          |             |          |                       |            |          |           |            |           |          |
| Category              | Term                                          | Count                                  | %        | Fold Enrich | PValue   | Genes                 | List Total | Pop Hits | Pop Total | Bonferroni | Benjamini | FDR      |
| SP_PIR_KEYWORDS       | protein transport                             | 6                                      | 2.40964  | 0.96731     | 7.43E-01 | PREB, ACAP1, SNX8, A  | 246        | 485      | 19235     | 1.00000    | 0.99414   | #####    |
| GOTERM_BP_FAT         | GO:0008104~protein localization               | 10                                     | 4.01606  | 0.82907     | 8.55E-01 | TNS4, PREB, PPY, VCP  | 185        | 882      | 13528     | 1.00000    | 0.99999   | #####    |
| GOTERM_BP_FAT         | GO:0015031~protein transport                  | 7                                      | 2.81124  | 0.67175     | 9.51E-01 | PREB, PPY, VCP, ACAF  | 185        | 762      | 13528     | 1.00000    | 1.00000   | #####    |
| GOTERM_BP_FAT         | GO:0045184~establishment of protein localiz   | 7                                      | 2.81124  | 0.66563     | 9.54E-01 | PREB, PPY, VCP, ACAF  | 185        | 769      | 13528     | 1.00000    | 1.00000   | #####    |
| Annotation Cluster 79 |                                               | Enrichment Score: 0.056039274662799544 |          |             |          |                       |            |          |           |            |           |          |
| Category              | Term                                          | Count                                  | %        | Fold Enrich | PValue   | Genes                 | List Total | Pop Hits | Pop Total | Bonferroni | Benjamini | FDR      |
| UP_SEQ_FEATURE        | short sequence motif:Nuclear localization sig | 7                                      | 2.81124  | 1.67343     | 2.42E-01 | TCF20, SP100, SGK2, N | 246        | 325      | 19113     | 1.00000    | 0.99716   | 98.61416 |
| SP_PIR_KEYWORDS       | activator                                     | 6                                      | 2.40964  | 0.90220     | 7.95E-01 | PREB, MEAF6, TCF20, I | 246        | 520      | 19235     | 1.00000    | 0.99619   | #####    |
| GOTERM_MF_FAT         | GO:0043565~sequence-specific DNA binding      | 7                                      | 2.81124  | 0.87047     | 8.17E-01 | JDP2, THRA, FLI1, NEU | 172        | 607      | 12983     | 1.00000    | 0.99988   | #####    |
| SP_PIR_KEYWORDS       | DNA binding                                   | 3                                      | 1.20482  | 0.68992     | 9.33E-01 | THRA, FLI1, RORC      | 246        | 340      | 19235     | 1.00000    | 0.99983   | #####    |
| GOTERM_MF_FAT         | GO:0003700~transcription factor activity      | 7                                      | 2.81124  | 0.54193     | 9.91E-01 | JDP2, THRA, FLI1, NEU | 172        | 975      | 12983     | 1.00000    | 1.00000   | #####    |
| GOTERM_MF_FAT         | GO:0030528~transcription regulator activity   | 10                                     | 4.01606  | 0.49922     | 9.99E-01 | PREB, TCF20, JDP2, SF | 172        | 1512     | 12983     | 1.00000    | 1.00000   | #####    |
| GOTERM_BP_FAT         | GO:0006355~regulation of transcription, DNA   | 13                                     | 5.22088  | 0.53616     | 9.99E-01 | JDP2, THRA, SP100, R  | 185        | 1773     | 13528     | 1.00000    | 1.00000   | #####    |
| GOTERM_BP_FAT         | GO:0051252~regulation of RNA metabolic pr     | 13                                     | 5.22088  | 0.52433     | 9.99E-01 | JDP2, THRA, SP100, R  | 185        | 1813     | 13528     | 1.00000    | 1.00000   | #####    |
| SP_PIR_KEYWORDS       | dna-binding                                   | 12                                     | 4.81928  | 0.50230     | 9.99E-01 | PREB, TCF20, JDP2, SF | 246        | 1868     | 19235     | 1.00000    | 1.00000   | #####    |
| SP_PIR_KEYWORDS       | transcription regulation                      | 12                                     | 4.81928  | 0.46313     | 1.00E+00 | PREB, MEAF6, TCF20, I | 246        | 2026     | 19235     | 1.00000    | 1.00000   | #####    |
| GOTERM_BP_FAT         | GO:0045449~regulation of transcription        | 19                                     | 7.63052  | 0.53416     | 1.00E+00 | MEAF6, JDP2, THRA, S  | 185        | 2601     | 13528     | 1.00000    | 1.00000   | #####    |
| SP_PIR_KEYWORDS       | Transcription                                 | 12                                     | 4.81928  | 0.45306     | 1.00E+00 | PREB, MEAF6, TCF20, I | 246        | 2071     | 19235     | 1.00000    | 1.00000   | #####    |
| GOTERM_MF_FAT         | GO:0003677~DNA binding                        | 15                                     | 6.02410  | 0.48573     | 1.00E+00 | JDP2, THRA, SP100, AF | 172        | 2331     | 12983     | 1.00000    | 1.00000   | #####    |
| SP_PIR_KEYWORDS       | nucleus                                       | 32                                     | 12.85141 | 0.58420     | 1.00E+00 | MEAF6, SEPT4, JDP2, I | 246        | 4283     | 19235     | 1.00000    | 1.00000   | #####    |
| GOTERM_BP_FAT         | GO:0006350~transcription                      | 12                                     | 4.81928  | 0.41765     | 1.00E+00 | PREB, MEAF6, TCF20, I | 185        | 2101     | 13528     | 1.00000    | 1.00000   | #####    |
| Annotation Cluster 80 |                                               | Enrichment Score: 0.051628304333218834 |          |             |          |                       |            |          |           |            |           |          |
| Category              | Term                                          | Count                                  | %        | Fold Enrich | PValue   | Genes                 | List Total | Pop Hits | Pop Total | Bonferroni | Benjamini | FDR      |
| GOTERM_CC_FAT         | GO:0005635~nuclear envelope                   | 3                                      | 1.20482  | 1.11341     | 7.52E-01 | SLC2A9, DNASE1, SYN   | 168        | 205      | 12782     | 1.00000    | 0.98904   | #####    |
| GOTERM_CC_FAT         | GO:0031967~organelle envelope                 | 5                                      | 2.00803  | 0.61358     | 9.65E-01 | SLC2A9, DNASE1, TME   | 168        | 620      | 12782     | 1.00000    | 0.99987   | #####    |
| GOTERM_CC_FAT         | GO:0031975~envelope                           | 5                                      | 2.00803  | 0.61160     | 9.65E-01 | SLC2A9, DNASE1, TME   | 168        | 622      | 12782     | 1.00000    | 0.99986   | #####    |
| Annotation Cluster 81 |                                               | Enrichment Score: 0.015703460336288787 |          |             |          |                       |            |          |           |            |           |          |
| Category              | Term                                          | Count                                  | %        | Fold Enrich | PValue   | Genes                 | List Total | Pop Hits | Pop Total | Bonferroni | Benjamini | FDR      |
| GOTERM_BP_FAT         | GO:0006397~mRNA processing                    | 3                                      | 1.20482  | 0.68340     | 9.35E-01 | APOBEC2, APP, CELF2   | 185        | 321      | 13528     | 1.00000    | 1.00000   | #####    |
| GOTERM_BP_FAT         | GO:0016071~mRNA metabolic process             | 3                                      | 1.20482  | 0.59290     | 9.63E-01 | APOBEC2, APP, CELF2   | 185        | 370      | 13528     | 1.00000    | 1.00000   | #####    |
| GOTERM_BP_FAT         | GO:0006396~RNA processing                     | 3                                      | 1.20482  | 0.40105     | 9.96E-01 | APOBEC2, APP, CELF2   | 185        | 547      | 13528     | 1.00000    | 1.00000   | #####    |
| Annotation Cluster 82 |                                               | Enrichment Score: 0.01523364117875514  |          |             |          |                       |            |          |           |            |           |          |
| Category              | Term                                          | Count                                  | %        | Fold Enrich | PValue   | Genes                 | List Total | Pop Hits | Pop Total | Bonferroni | Benjamini | FDR      |
| GOTERM_MF_FAT         | GO:0016563~transcription activator activity   | 5                                      | 2.00803  | 0.92052     | 7.93E-01 | PREB, TCF20, SP100, T | 172        | 410      | 12983     | 1.00000    | 0.99982   | #####    |
| GOTERM_MF_FAT         | GO:0046983~protein dimerization activity      | 6                                      | 2.40964  | 0.83560     | 8.47E-01 | JDP2, SP100, THRA, P2 | 172        | 542      | 12983     | 1.00000    | 0.99992   | #####    |
| GOTERM_MF_FAT         | GO:0016564~transcription repressor activity   | 3                                      | 1.20482  | 0.71661     | 9.23E-01 | JDP2, SP100, THRA     | 172        | 316      | 12983     | 1.00000    | 0.99999   | #####    |
| GOTERM_BP_FAT         | GO:0045893~positive regulation of transcripti | 4                                      | 1.60643  | 0.61320     | 9.60E-01 | APP, SP100, THRA, NE  | 185        | 477      | 13528     | 1.00000    | 1.00000   | #####    |
| GOTERM_BP_FAT         | GO:0051254~positive regulation of RNA met     | 4                                      | 1.60643  | 0.60810     | 9.62E-01 | APP, SP100, THRA, NE  | 185        | 481      | 13528     | 1.00000    | 1.00000   | #####    |
| GOTERM_BP_FAT         | GO:0045944~positive regulation of transcripti | 3                                      | 1.20482  | 0.59130     | 9.64E-01 | APP, THRA, NEUROD1    | 185        | 371      | 13528     | 1.00000    | 1.00000   | #####    |
| GOTERM_BP_FAT         | GO:0051172~negative regulation of nitrogen i  | 4                                      | 1.60643  | 0.56358     | 9.74E-01 | JDP2, SP100, THRA, C  | 185        | 519      | 13528     | 1.00000    | 1.00000   | #####    |
| GOTERM_BP_FAT         | GO:0051173~positive regulation of nitrogen c  | 5                                      | 2.00803  | 0.56774     | 9.78E-01 | APP, SP100, THRA, NE  | 185        | 644      | 13528     | 1.00000    | 1.00000   | #####    |
| GOTERM_BP_FAT         | GO:0010557~positive regulation of macromol    | 5                                      | 2.00803  | 0.55905     | 9.80E-01 | APP, SP100, THRA, GC  | 185        | 654      | 13528     | 1.00000    | 1.00000   | #####    |
| GOTERM_BP_FAT         | GO:0031327~negative regulation of cellular b  | 4                                      | 1.60643  | 0.52139     | 9.84E-01 | JDP2, SP100, THRA, G  | 185        | 561      | 13528     | 1.00000    | 1.00000   | #####    |
| GOTERM_BP_FAT         | GO:0045941~positive regulation of transcripti | 4                                      | 1.60643  | 0.51861     | 9.84E-01 | APP, SP100, THRA, NE  | 185        | 564      | 13528     | 1.00000    | 1.00000   | #####    |

|               |                                               |   |         |         |          |                       |     |     |       |         |         |       |
|---------------|-----------------------------------------------|---|---------|---------|----------|-----------------------|-----|-----|-------|---------|---------|-------|
| GOTERM_BP_FAT | GO:0031328~positive regulation of cellular bi | 5 | 2.00803 | 0.53375 | 9.85E-01 | APP, SP100, THRA, GC  | 185 | 685 | 13528 | 1.00000 | 1.00000 | ##### |
| GOTERM_BP_FAT | GO:0009890~negative regulation of biosynthe   | 4 | 1.60643 | 0.51047 | 9.86E-01 | JDP2, SP100, THRA, G  | 185 | 573 | 13528 | 1.00000 | 1.00000 | ##### |
| GOTERM_BP_FAT | GO:0009891~positive regulation of biosynthe   | 5 | 2.00803 | 0.52607 | 9.87E-01 | APP, SP100, THRA, GC  | 185 | 695 | 13528 | 1.00000 | 1.00000 | ##### |
| GOTERM_BP_FAT | GO:0010628~positive regulation of gene expr   | 4 | 1.60643 | 0.50344 | 9.87E-01 | APP, SP100, THRA, NE  | 185 | 581 | 13528 | 1.00000 | 1.00000 | ##### |
| GOTERM_BP_FAT | GO:0016481~negative regulation of transcript  | 3 | 1.20482 | 0.47794 | 9.87E-01 | JDP2, SP100, THRA     | 185 | 459 | 13528 | 1.00000 | 1.00000 | ##### |
| GOTERM_BP_FAT | GO:0006357~regulation of transcription from   | 5 | 2.00803 | 0.50292 | 9.91E-01 | APP, JDP2, SP100, THF | 185 | 727 | 13528 | 1.00000 | 1.00000 | ##### |
| GOTERM_BP_FAT | GO:0045935~positive regulation of nucleobas   | 4 | 1.60643 | 0.46875 | 9.92E-01 | APP, SP100, THRA, NE  | 185 | 624 | 13528 | 1.00000 | 1.00000 | ##### |
| GOTERM_BP_FAT | GO:0010604~positive regulation of macromol    | 6 | 2.40964 | 0.51196 | 9.92E-01 | APP, SP100, THRA, GC  | 185 | 857 | 13528 | 1.00000 | 1.00000 | ##### |
| GOTERM_BP_FAT | GO:0010629~negative regulation of gene exp    | 3 | 1.20482 | 0.43526 | 9.93E-01 | JDP2, SP100, THRA     | 185 | 504 | 13528 | 1.00000 | 1.00000 | ##### |
| GOTERM_BP_FAT | GO:0045934~negative regulation of nucleoba    | 3 | 1.20482 | 0.42846 | 9.93E-01 | JDP2, SP100, THRA     | 185 | 512 | 13528 | 1.00000 | 1.00000 | ##### |
| GOTERM_BP_FAT | GO:0010558~negative regulation of macromc     | 3 | 1.20482 | 0.40105 | 9.96E-01 | JDP2, SP100, THRA     | 185 | 547 | 13528 | 1.00000 | 1.00000 | ##### |
| GOTERM_BP_FAT | GO:0010605~negative regulation of macromc     | 3 | 1.20482 | 0.29887 | 1.00E+00 | JDP2, SP100, THRA     | 185 | 734 | 13528 | 1.00000 | 1.00000 | ##### |

## Annotation Cluster 83 Enrichment Score: 0.011518328251924394

| Category        | Term                                          | Count | %       | Fold Enrich | PValue   | Genes                | List Total | Pop Hits | Pop Total | Bonferroni | Benjamini | FDR   |
|-----------------|-----------------------------------------------|-------|---------|-------------|----------|----------------------|------------|----------|-----------|------------|-----------|-------|
| GOTERM_BP_FAT   | GO:0006508~proteolysis                        | 11    | 4.41767 | 0.76316     | 9.16E-01 | MMP21, VCP, KLK3, FB | 185        | 1054     | 13528     | 1.00000    | 1.00000   | ##### |
| GOTERM_BP_FAT   | GO:0009057~macromolecule catabolic proce      | 7     | 2.81124 | 0.65540     | 9.59E-01 | DNASE1, SPACA3, VCF  | 185        | 781      | 13528     | 1.00000    | 1.00000   | ##### |
| SP_PIR_KEYWORDS | ubl conjugation pathway                       | 4     | 1.60643 | 0.61447     | 9.59E-01 | VCP, FBXO17, HERC6,  | 246        | 509      | 19235     | 1.00000    | 0.99996   | ##### |
| GOTERM_BP_FAT   | GO:0019941~modification-dependent protein     | 4     | 1.60643 | 0.50958     | 9.86E-01 | VCP, FBXO17, HERC6,  | 185        | 574      | 13528     | 1.00000    | 1.00000   | ##### |
| GOTERM_BP_FAT   | GO:0043632~modification-dependent macron      | 4     | 1.60643 | 0.50958     | 9.86E-01 | VCP, FBXO17, HERC6,  | 185        | 574      | 13528     | 1.00000    | 1.00000   | ##### |
| GOTERM_BP_FAT   | GO:0051603~proteolysis involved in cellular p | 4     | 1.60643 | 0.48750     | 9.90E-01 | VCP, FBXO17, HERC6,  | 185        | 600      | 13528     | 1.00000    | 1.00000   | ##### |
| GOTERM_BP_FAT   | GO:0044257~cellular protein catabolic proces  | 4     | 1.60643 | 0.48507     | 9.90E-01 | VCP, FBXO17, HERC6,  | 185        | 603      | 13528     | 1.00000    | 1.00000   | ##### |
| GOTERM_BP_FAT   | GO:0044265~cellular macromolecule cataboli    | 5     | 2.00803 | 0.50431     | 9.90E-01 | DNASE1, VCP, FBXO17  | 185        | 725      | 13528     | 1.00000    | 1.00000   | ##### |
| GOTERM_BP_FAT   | GO:0030163~protein catabolic process          | 4     | 1.60643 | 0.47025     | 9.92E-01 | VCP, FBXO17, HERC6,  | 185        | 622      | 13528     | 1.00000    | 1.00000   | ##### |

## Annotation Cluster 84 Enrichment Score: 0.0027689702304179047

| Category      | Term                                     | Count | %       | Fold Enrich | PValue   | Genes                | List Total | Pop Hits | Pop Total | Bonferroni | Benjamini | FDR   |
|---------------|------------------------------------------|-------|---------|-------------|----------|----------------------|------------|----------|-----------|------------|-----------|-------|
| GOTERM_CC_FAT | GO:0044451~nucleoplasm part              | 4     | 1.60643 | 0.54835     | 9.78E-01 | BRD1, MEAF6, CCR6, S | 168        | 555      | 12782     | 1.00000    | 0.99994   | ##### |
| GOTERM_CC_FAT | GO:0005730~nucleolus                     | 5     | 2.00803 | 0.54501     | 9.83E-01 | MEAF6, SP100, VCP, N | 168        | 698      | 12782     | 1.00000    | 0.99997   | ##### |
| GOTERM_CC_FAT | GO:0005654~nucleoplasm                   | 5     | 2.00803 | 0.43131     | 9.98E-01 | BRD1, MEAF6, CCR6, S | 168        | 882      | 12782     | 1.00000    | 1.00000   | ##### |
| GOTERM_CC_FAT | GO:0043233~organelle lumen               | 13    | 5.22088 | 0.54345     | 9.98E-01 | CES3, MEAF6, BRD1, S | 168        | 1820     | 12782     | 1.00000    | 1.00000   | ##### |
| GOTERM_CC_FAT | GO:0031974~membrane-enclosed lumen       | 13    | 5.22088 | 0.53291     | 9.99E-01 | CES3, MEAF6, BRD1, S | 168        | 1856     | 12782     | 1.00000    | 1.00000   | ##### |
| GOTERM_CC_FAT | GO:0070013~intracellular organelle lumen | 11    | 4.41767 | 0.47044     | 1.00E+00 | BRD1, MEAF6, CES3, C | 168        | 1779     | 12782     | 1.00000    | 1.00000   | ##### |
| GOTERM_CC_FAT | GO:0031981~nuclear lumen                 | 8     | 3.21285 | 0.41977     | 1.00E+00 | BRD1, MEAF6, CCR6, S | 168        | 1450     | 12782     | 1.00000    | 1.00000   | ##### |

## Annotation Cluster 85 Enrichment Score: 6.80208657524169E-4

| Category        | Term                          | Count | %       | Fold Enrich | PValue   | Genes               | List Total | Pop Hits | Pop Total | Bonferroni | Benjamini | FDR   |
|-----------------|-------------------------------|-------|---------|-------------|----------|---------------------|------------|----------|-----------|------------|-----------|-------|
| GOTERM_CC_FAT   | GO:0044429~mitochondrial part | 3     | 1.20482 | 0.38361     | 9.97E-01 | TMEM173, ALDH4A1, A | 168        | 595      | 12782     | 1.00000    | 1.00000   | ##### |
| SP_PIR_KEYWORDS | mitochondrion                 | 4     | 1.60643 | 0.37592     | 9.99E-01 | SEPT4, TMEM173, ALD | 246        | 832      | 19235     | 1.00000    | 1.00000   | ##### |
| GOTERM_CC_FAT   | GO:0005739~mitochondrion      | 5     | 2.00803 | 0.34997     | 1.00E+00 | TMEM173, GCK, RIPK1 | 168        | 1087     | 12782     | 1.00000    | 1.00000   | ##### |
